# Supplementary material for: Immune modulation of innate and adaptive responses restores immune surveillance and establishes anti-tumor immunological memory
Source: PubMed Central journal article supplement — bioRxiv. 2023 Sep 29:2023.09.27.559828. Preprint. [Version 1] doi: 10.1101/2023.09.27.559828 (PMC10557730; doi:10.1101/2023.09.27.559828), 2023-09-29

# Supplementary Figure 1

## CD8 Gating Strategy

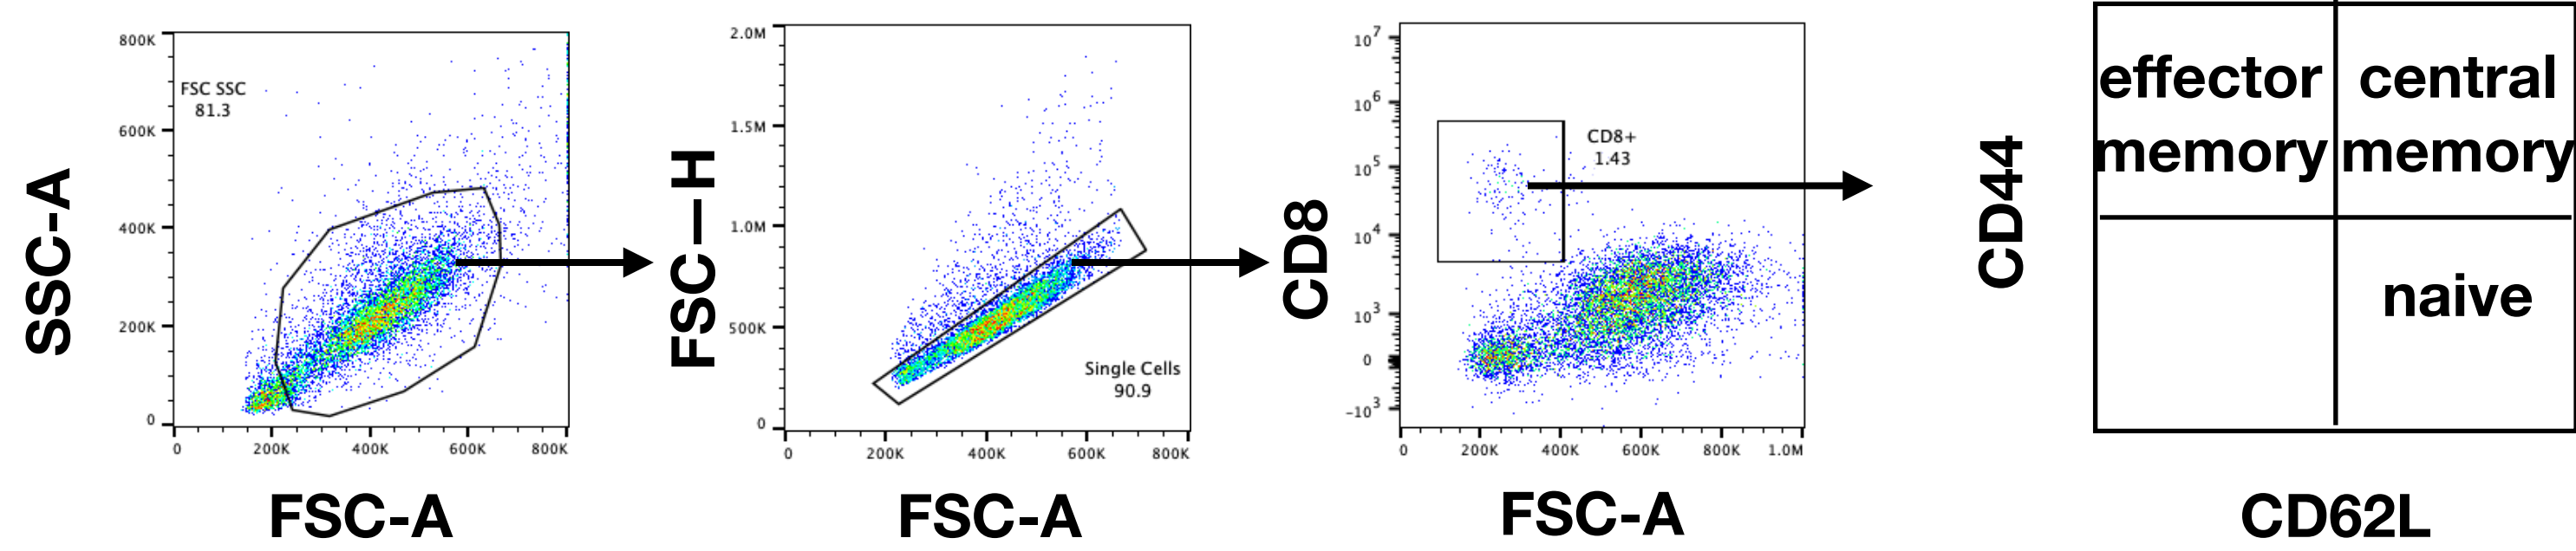

## Macrophage Analysis Gating Strategy

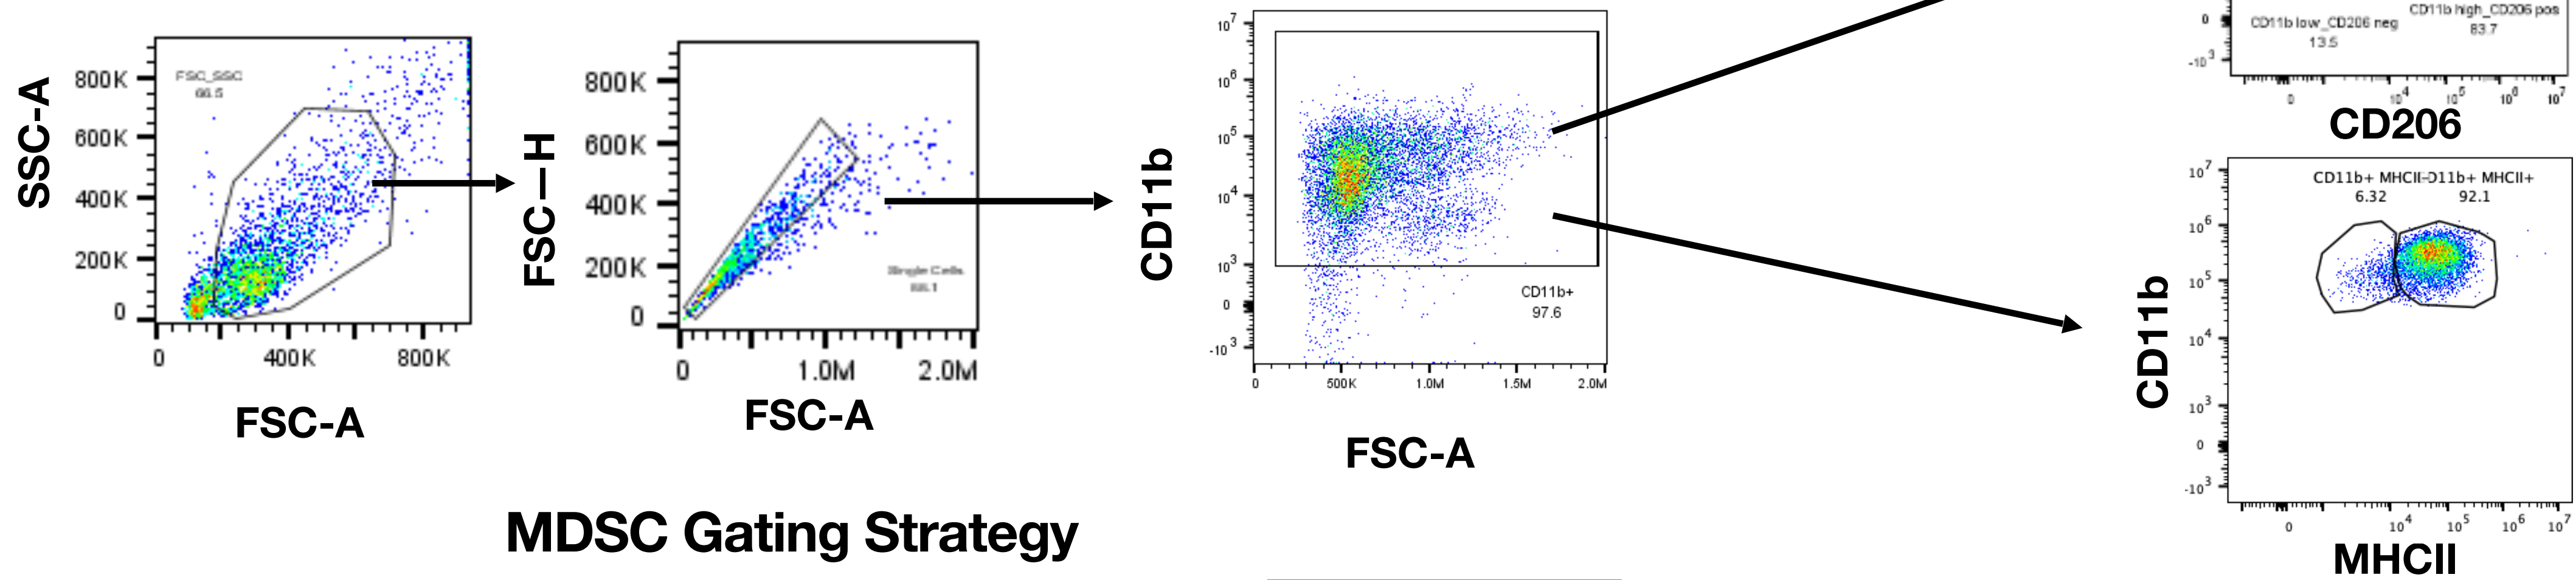

## MDSC Gating Strategy

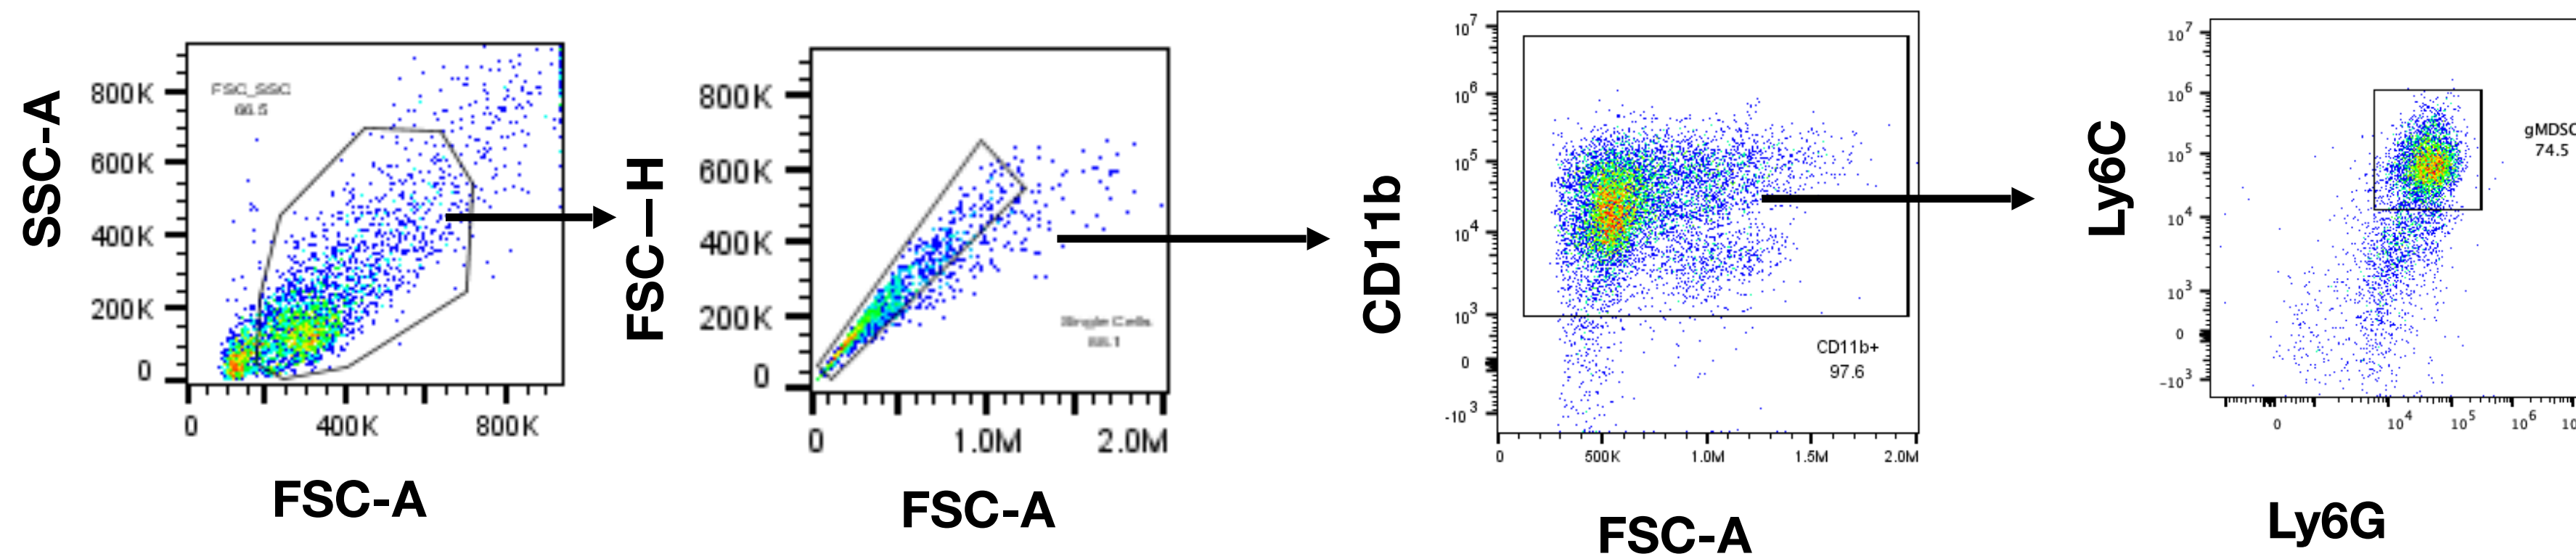

Supplementary Figure 2

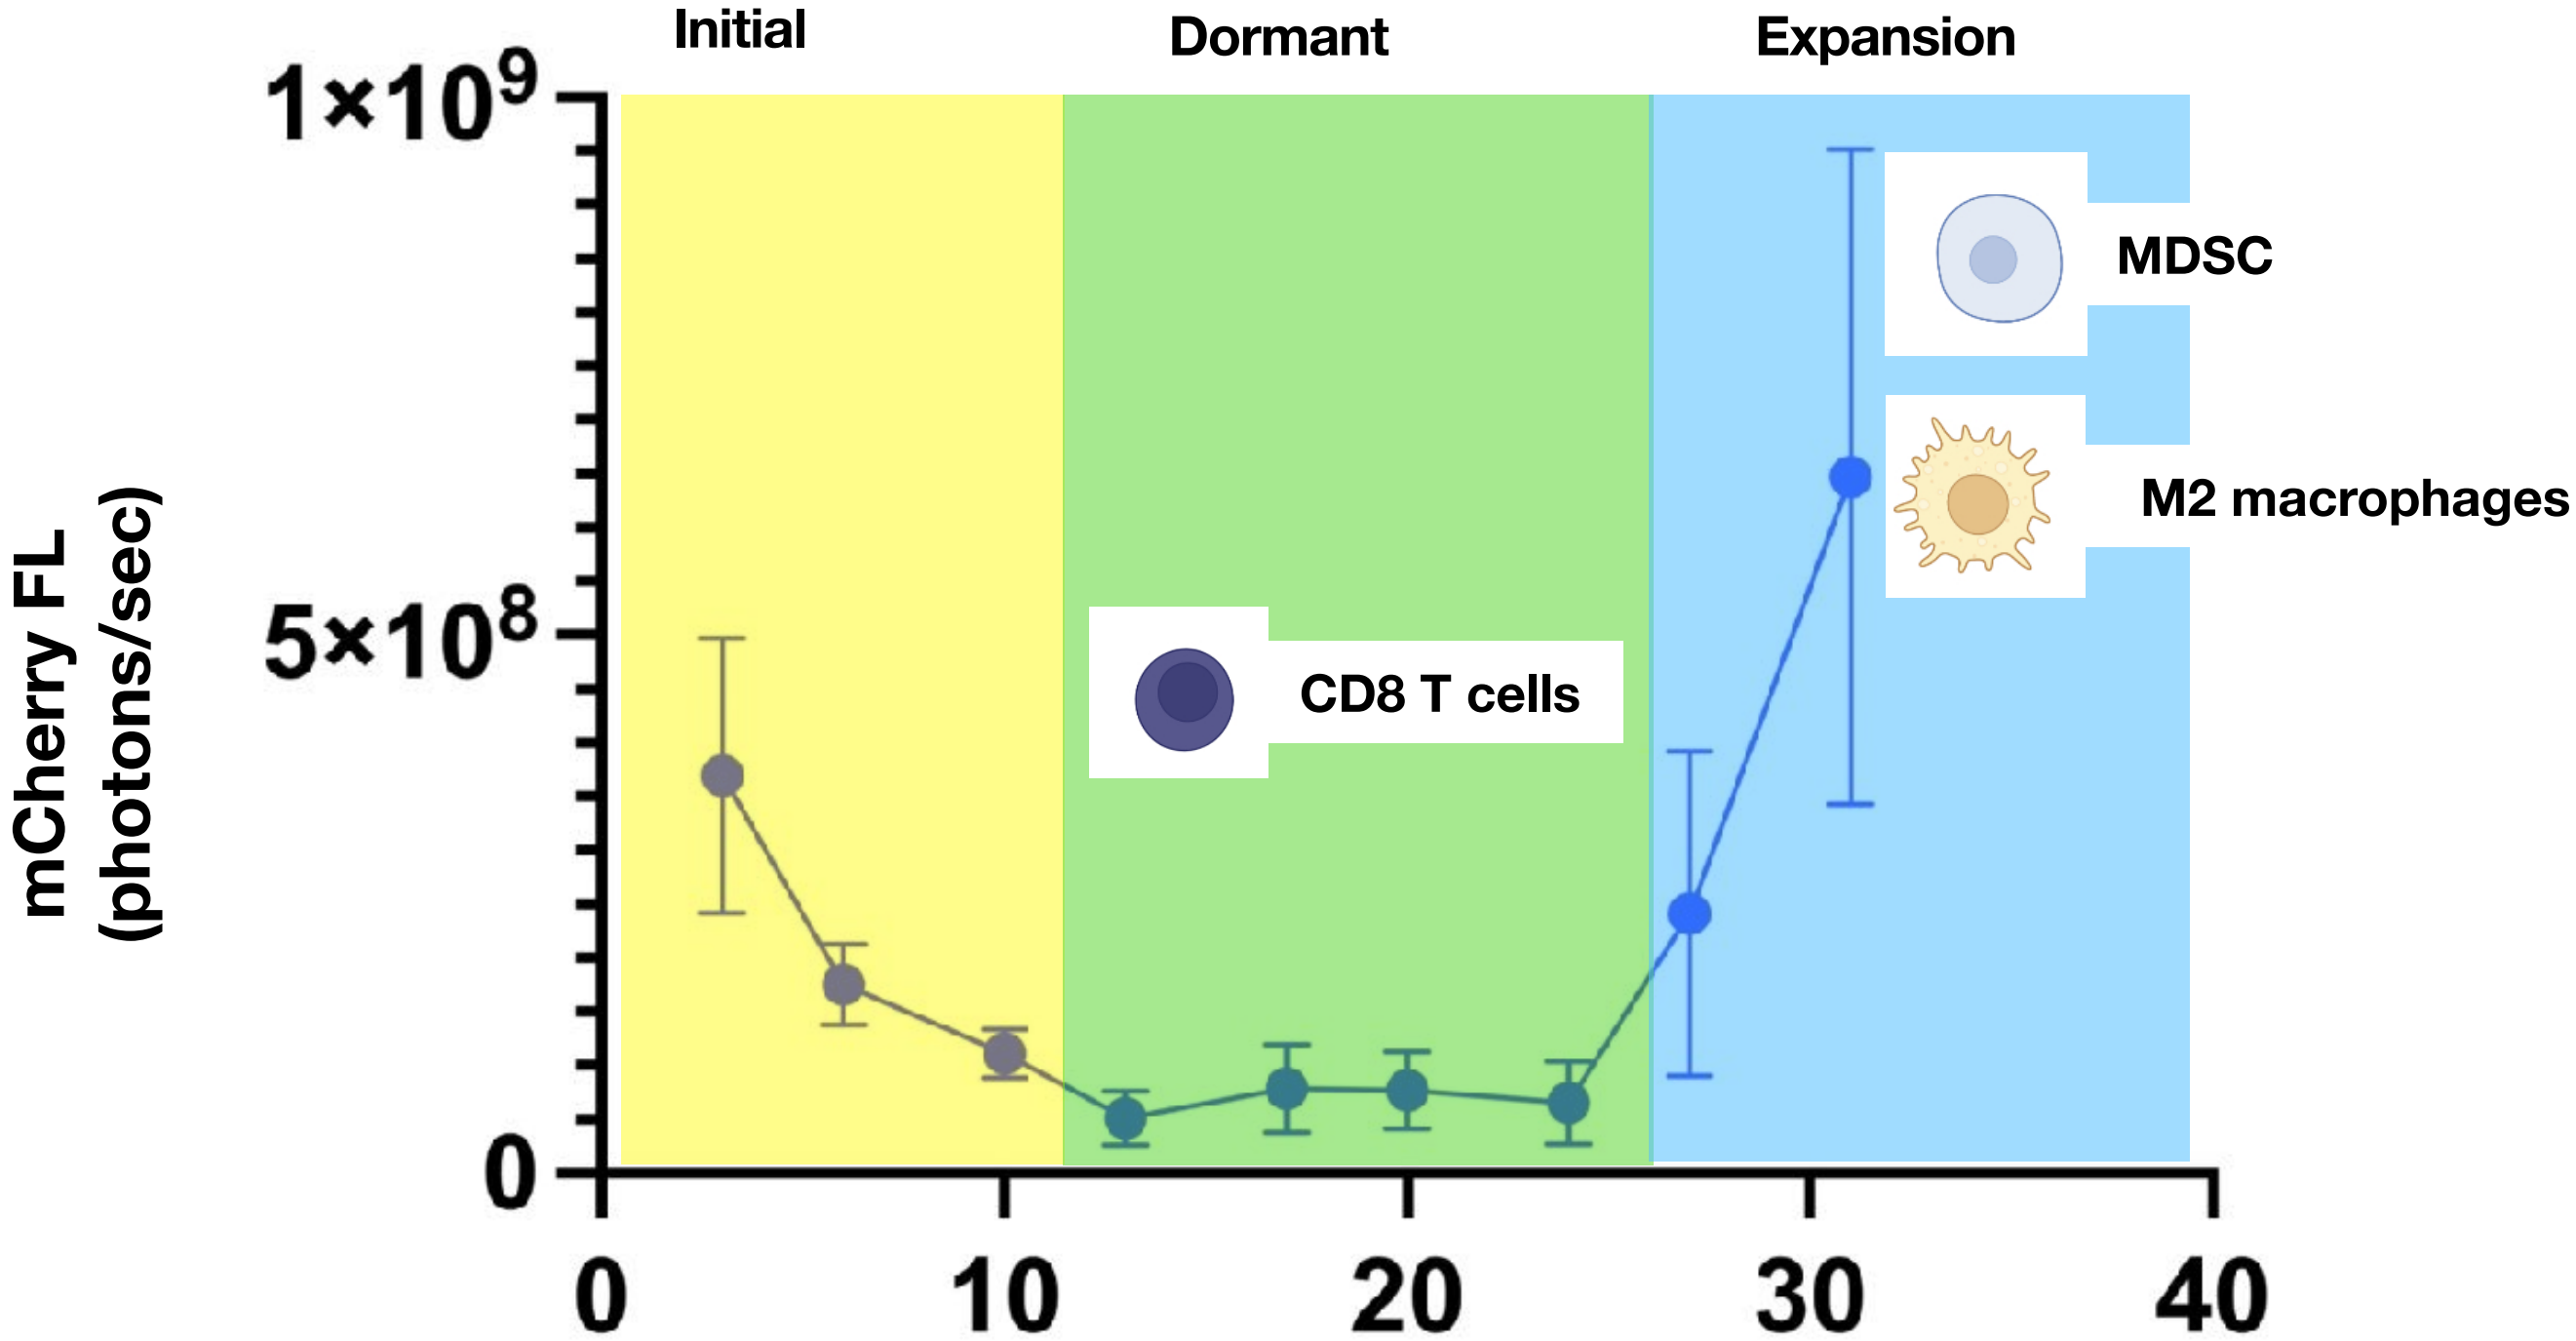

# Supplementary Figure 3

**A**

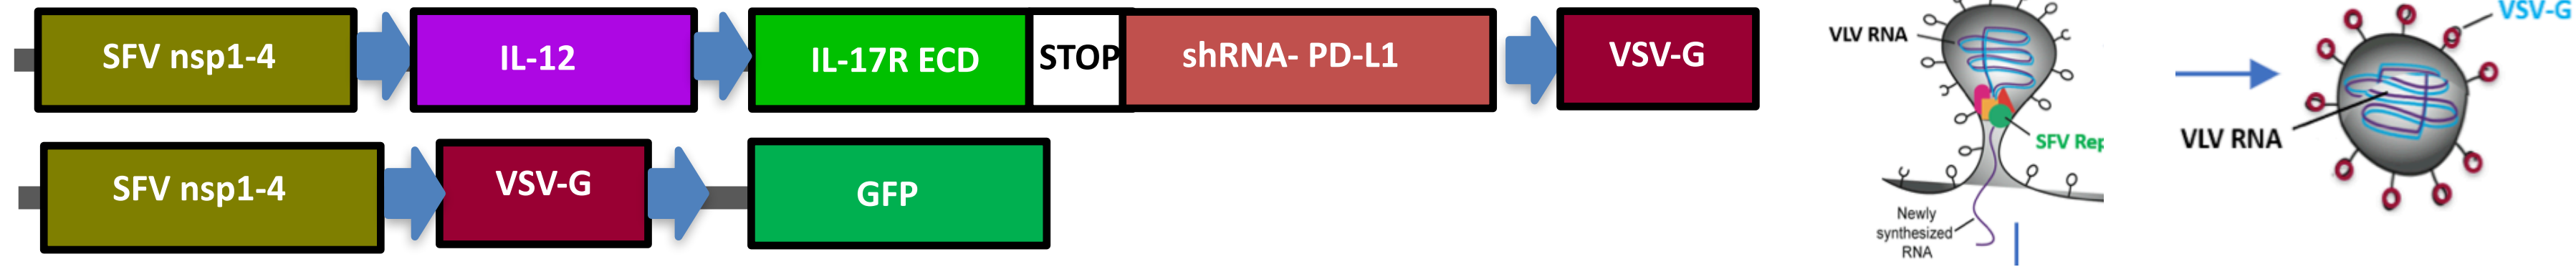

**B**

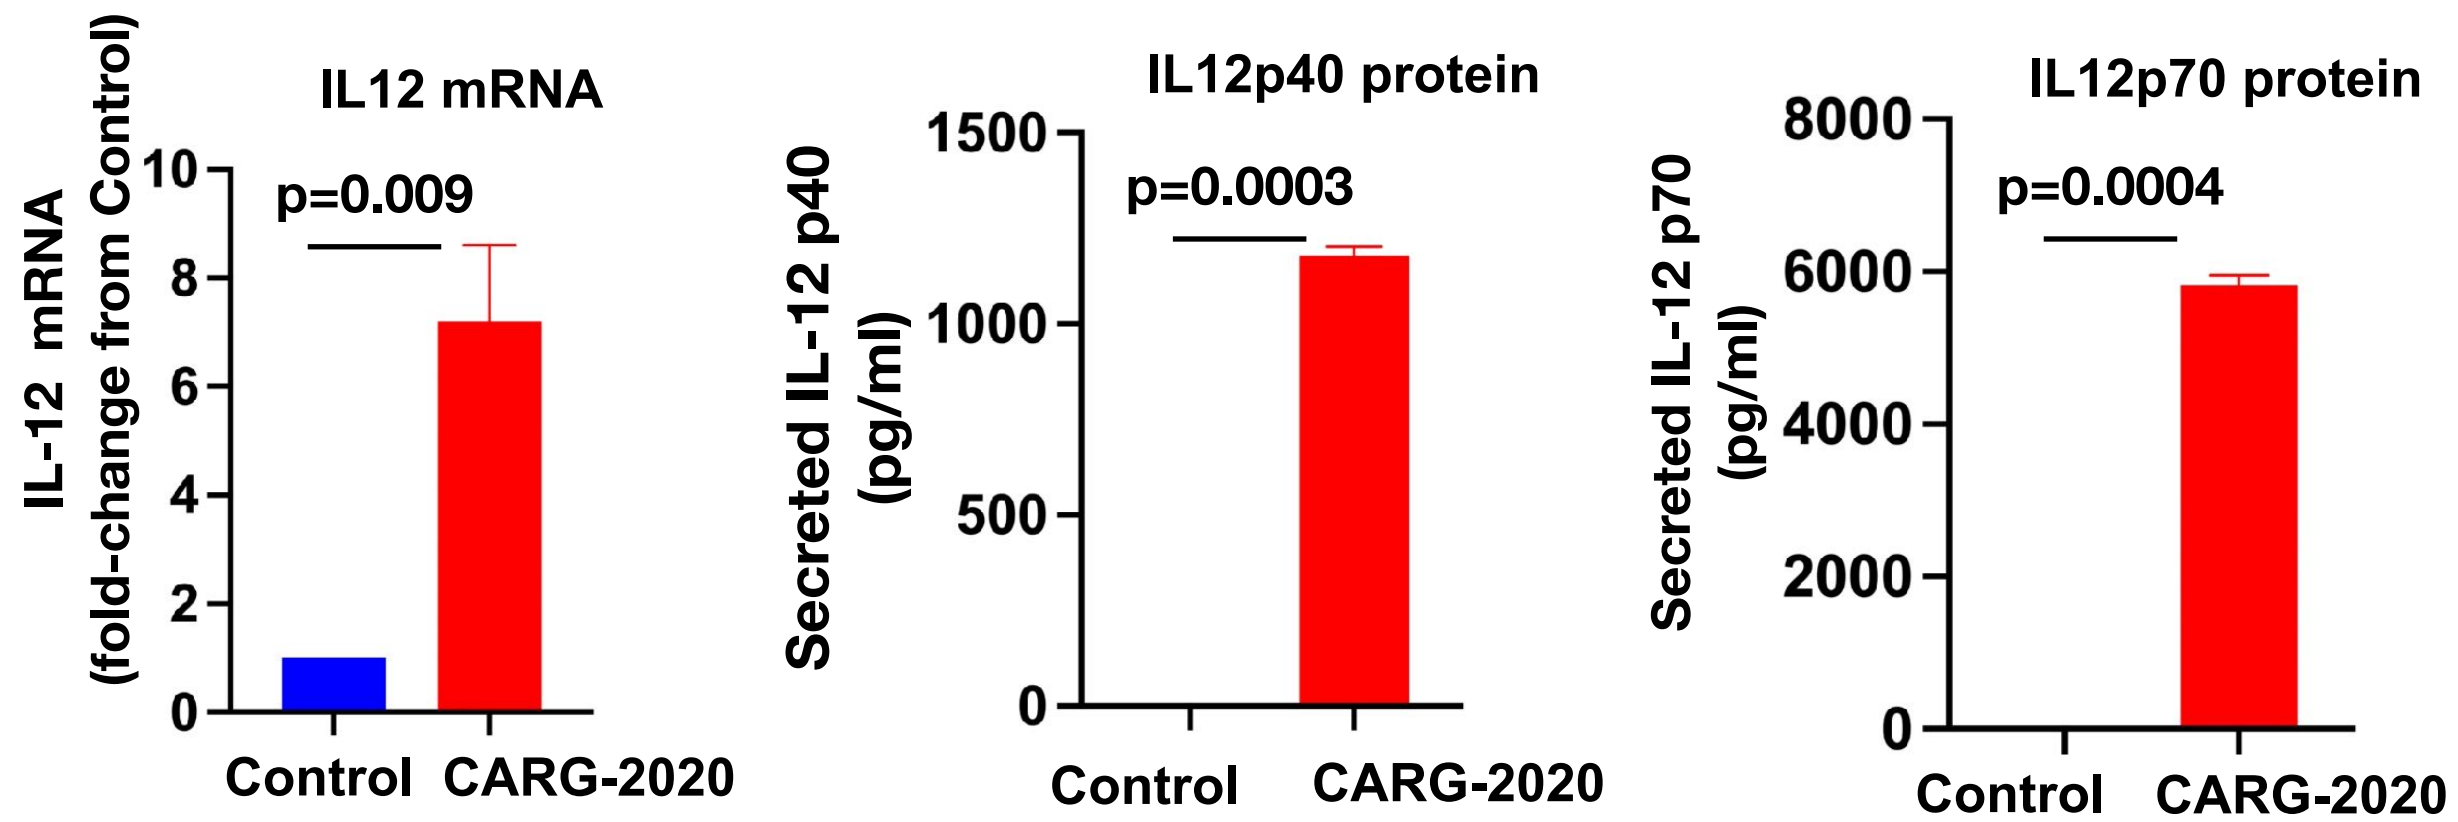

**C**

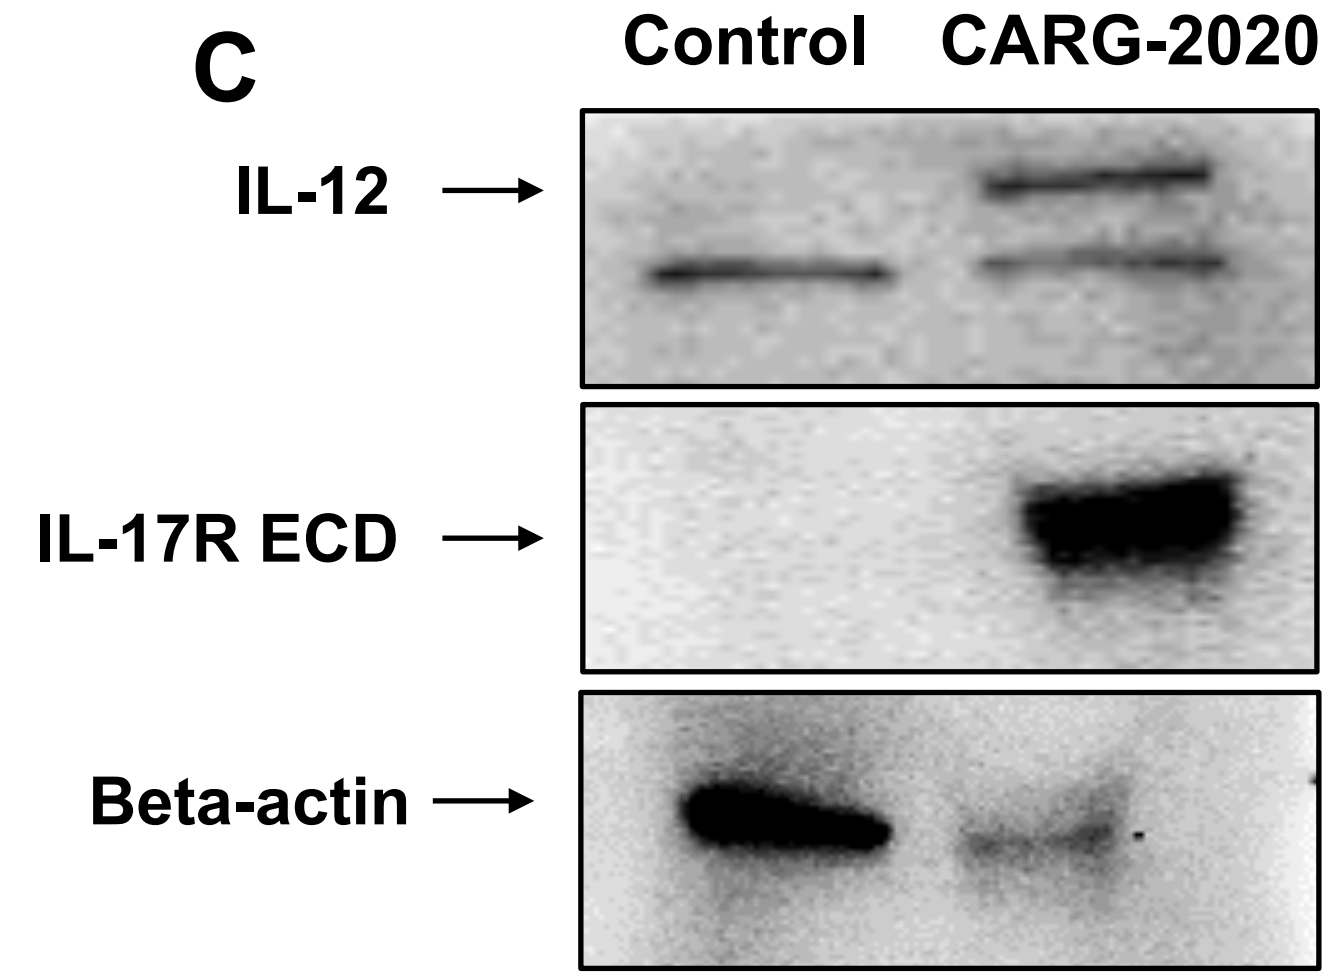

**D**

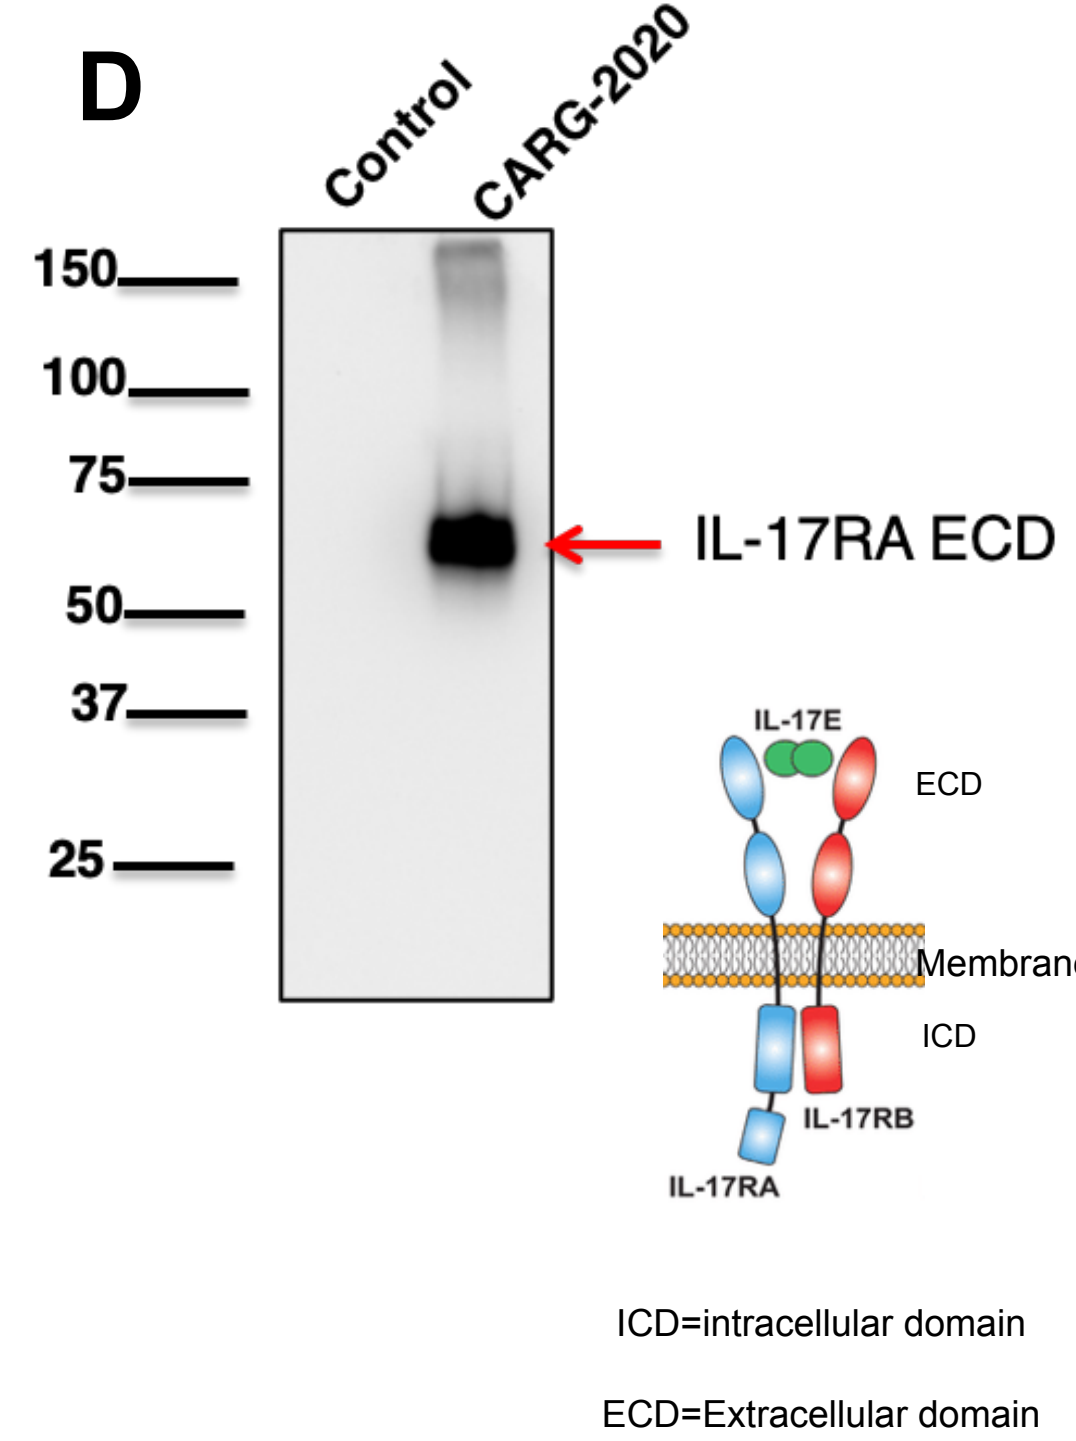

**E**

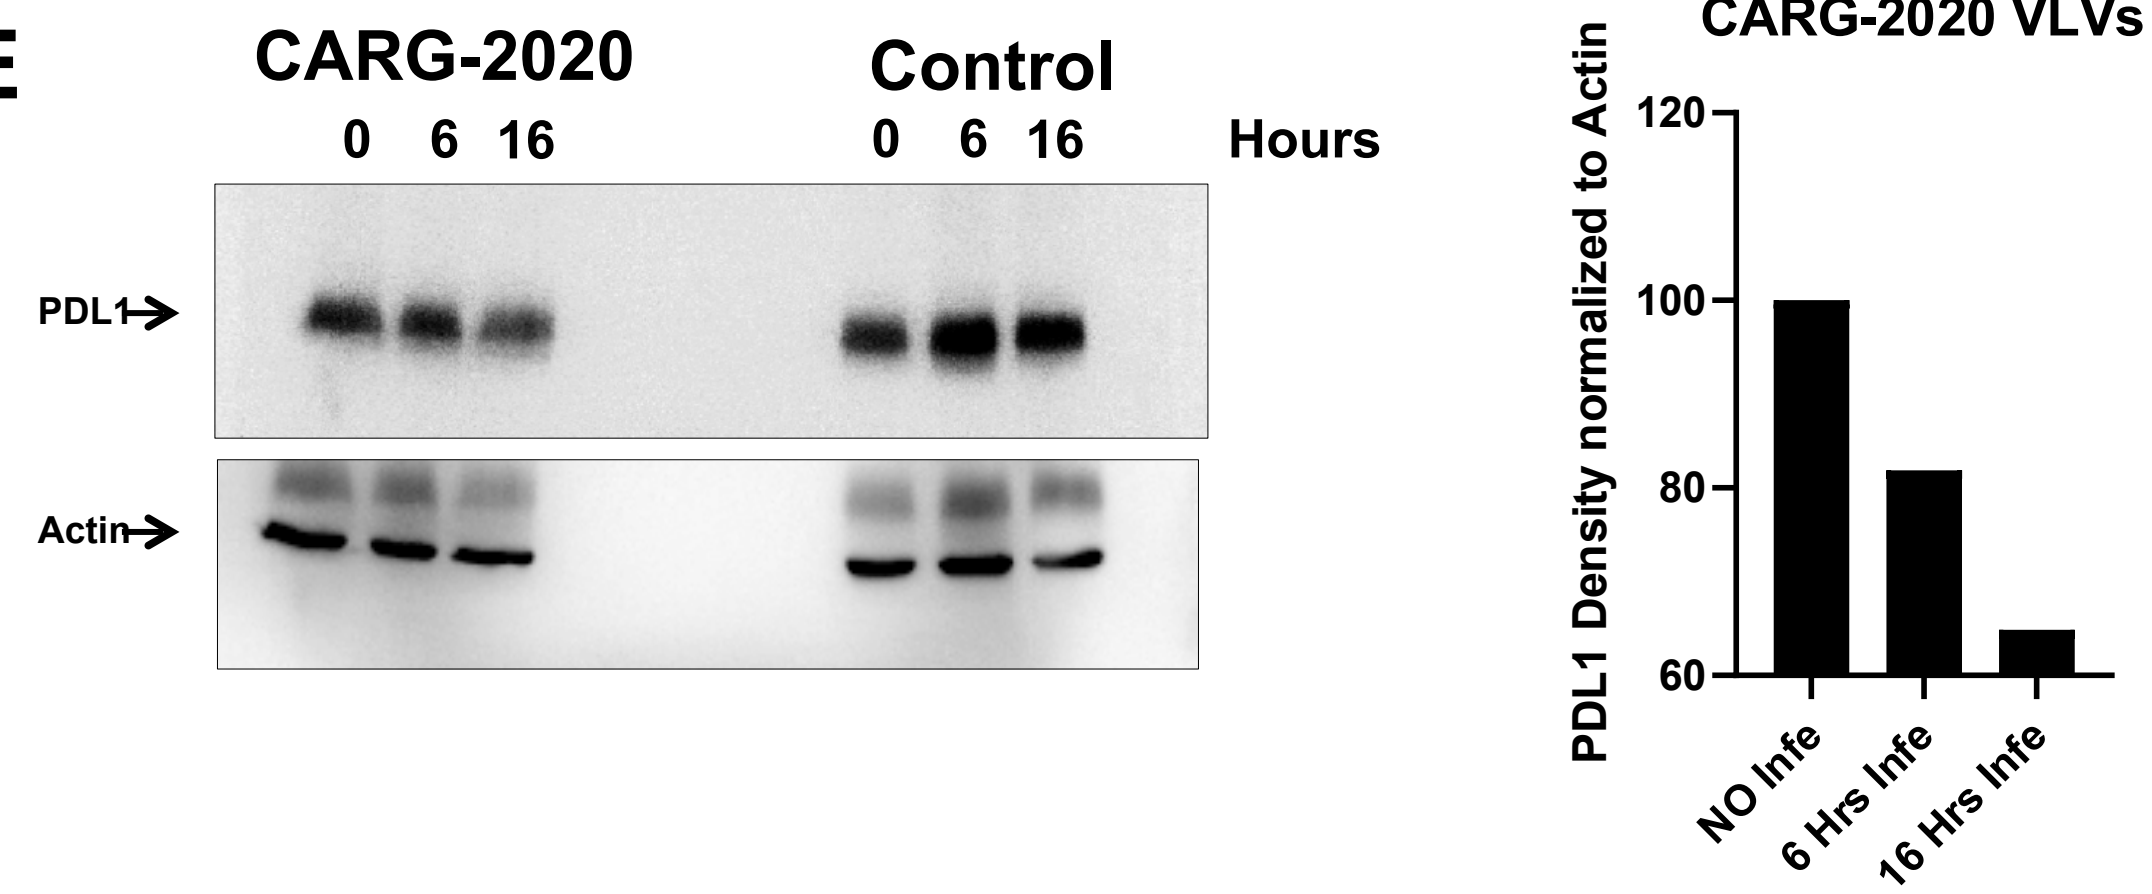

**F**

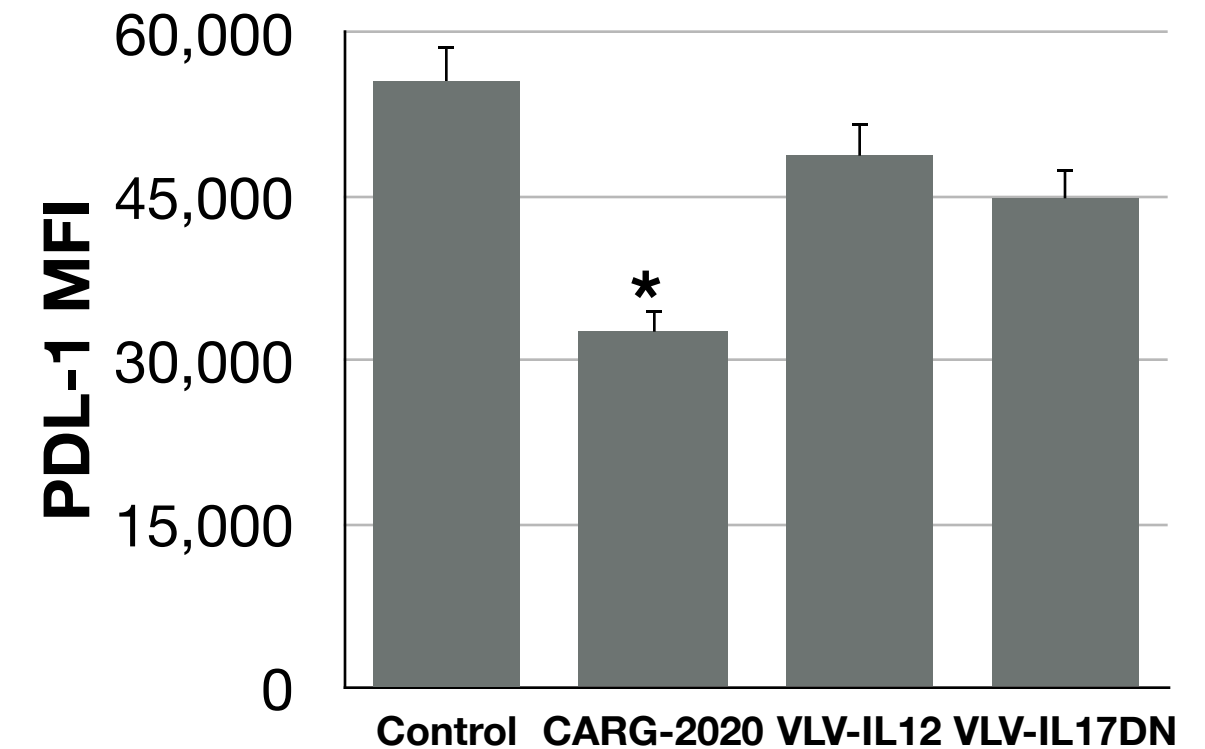



# Supplementary Figure 4

**A**

**VLV-GFP**

**CARG-2020**

**Confluence**

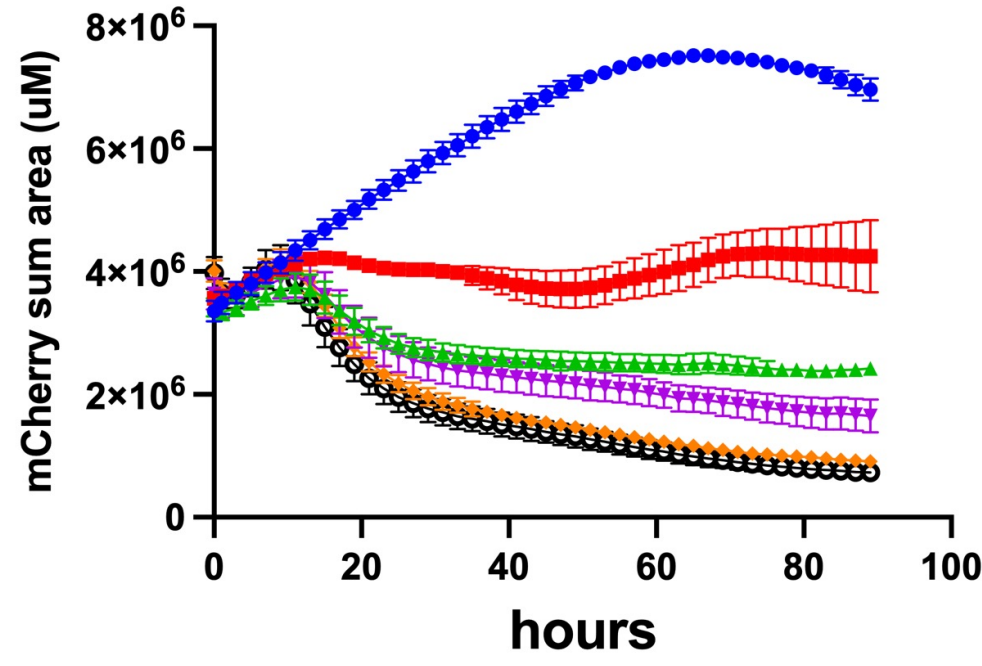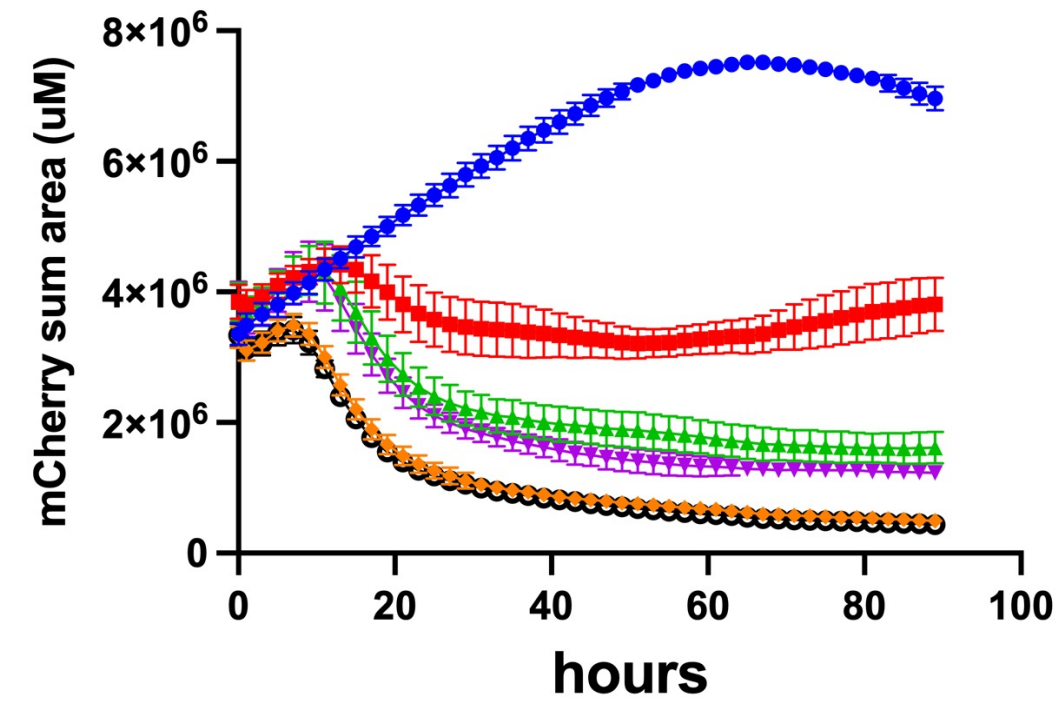

**Cell death**

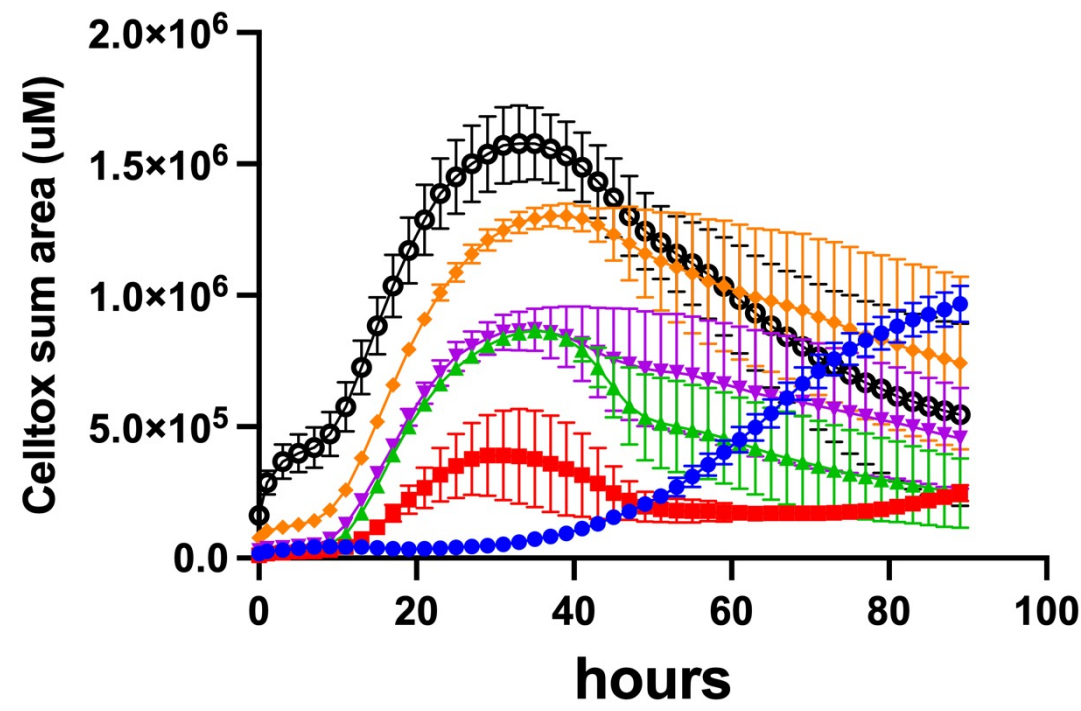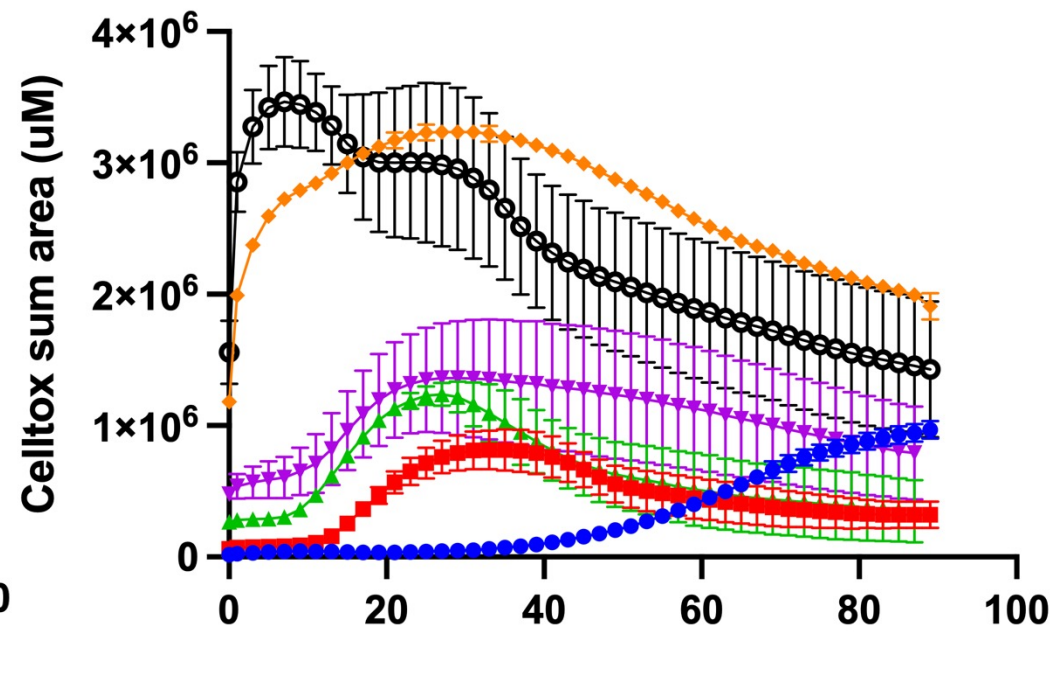

**C**

**OCSC1-F2 human ovarian cancer cells**

**Human Stroma cells**

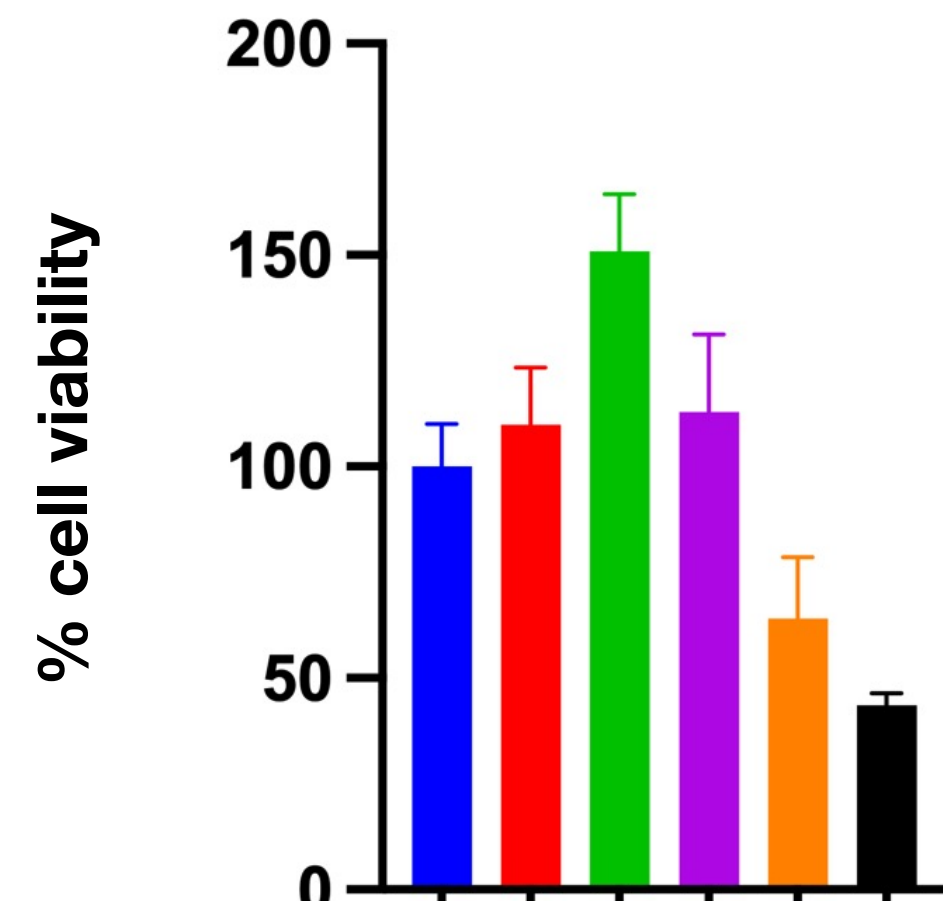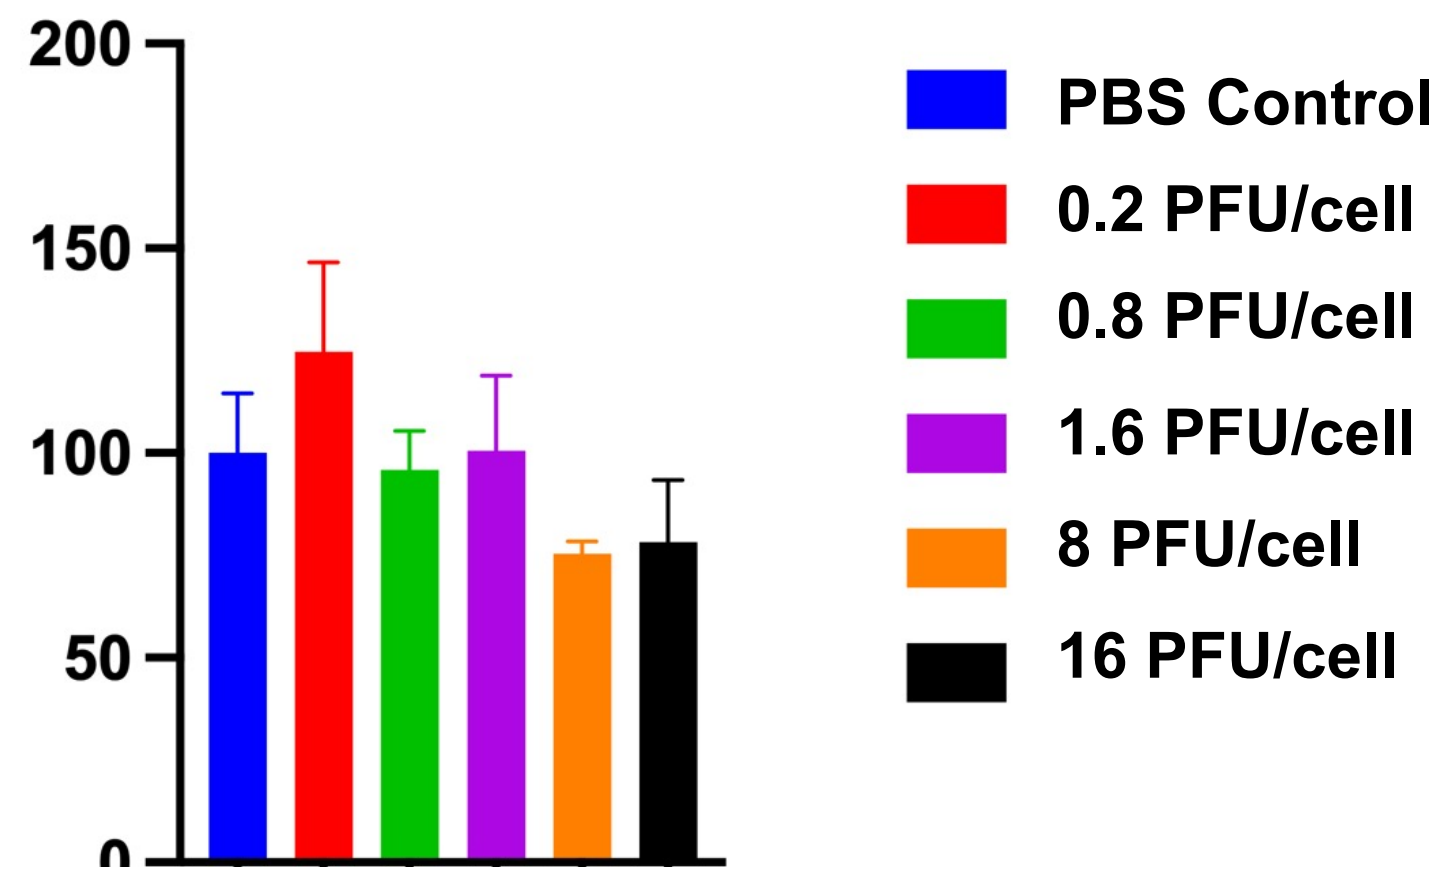

**B**

**Control**

**CARG-2020  
16 PFU/cell**

**Hours**

**12**

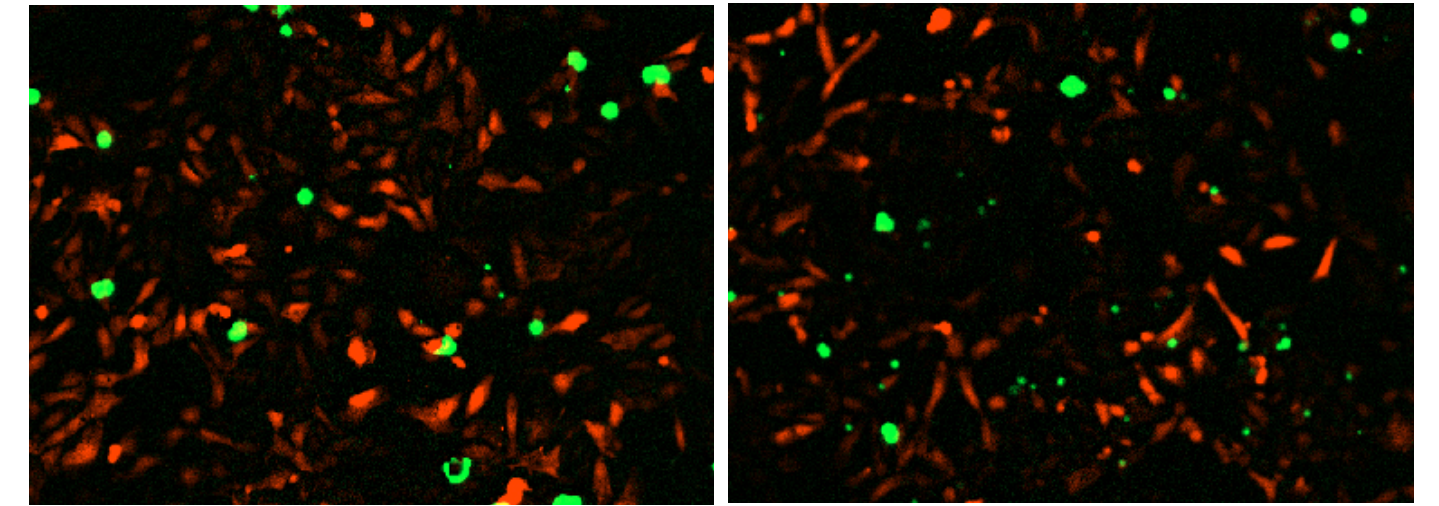

**24**

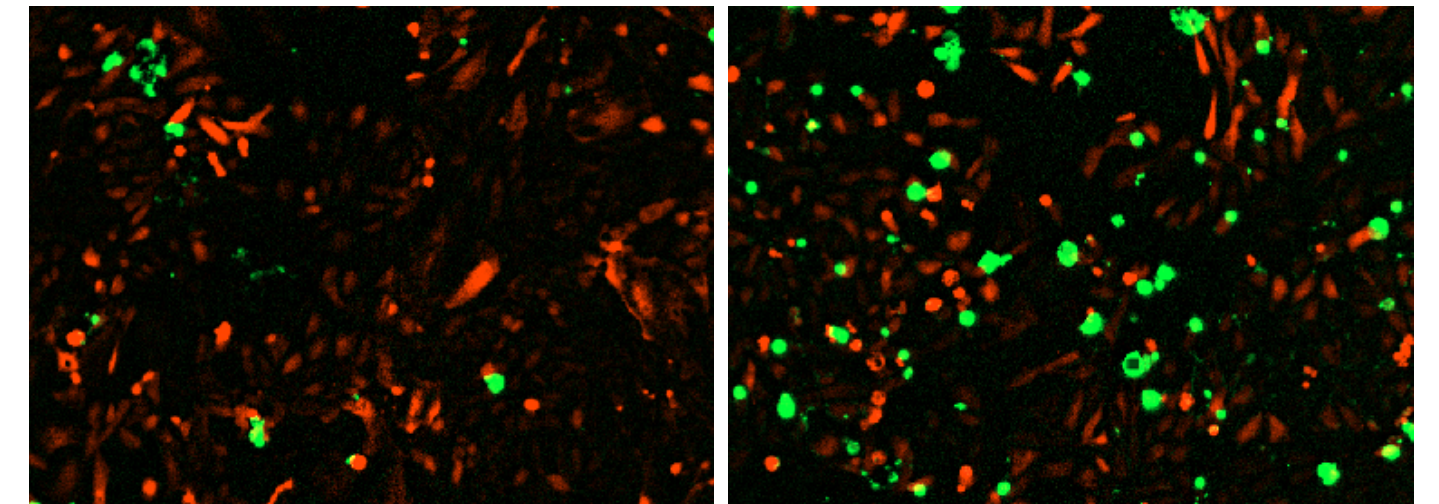

**48**

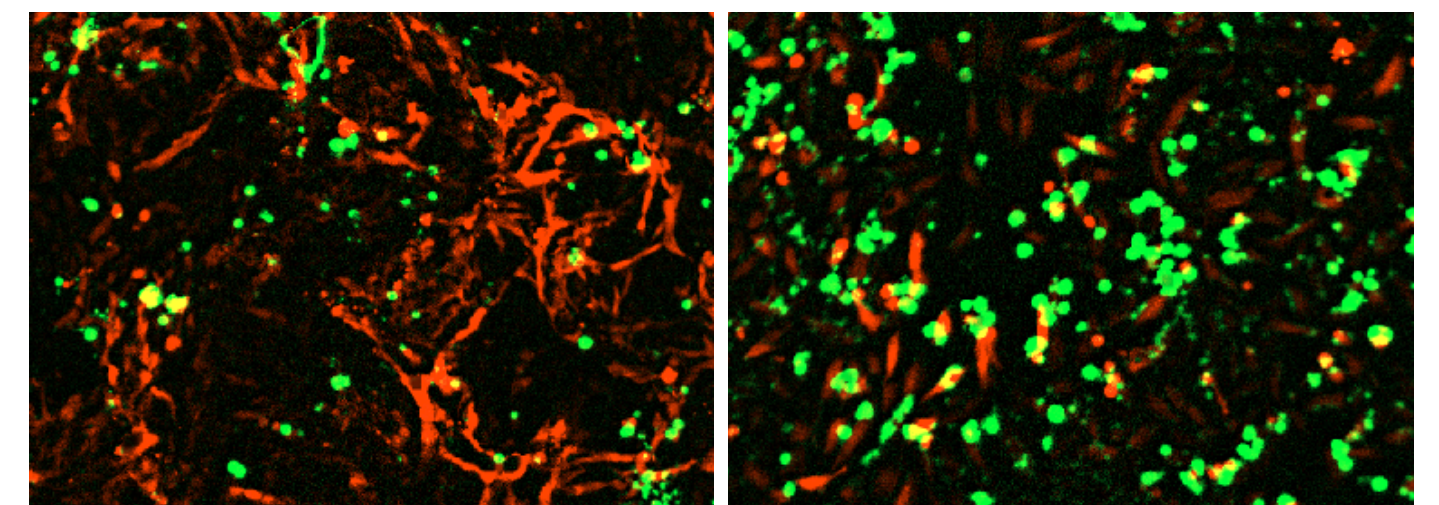



Supplementary Figure 5

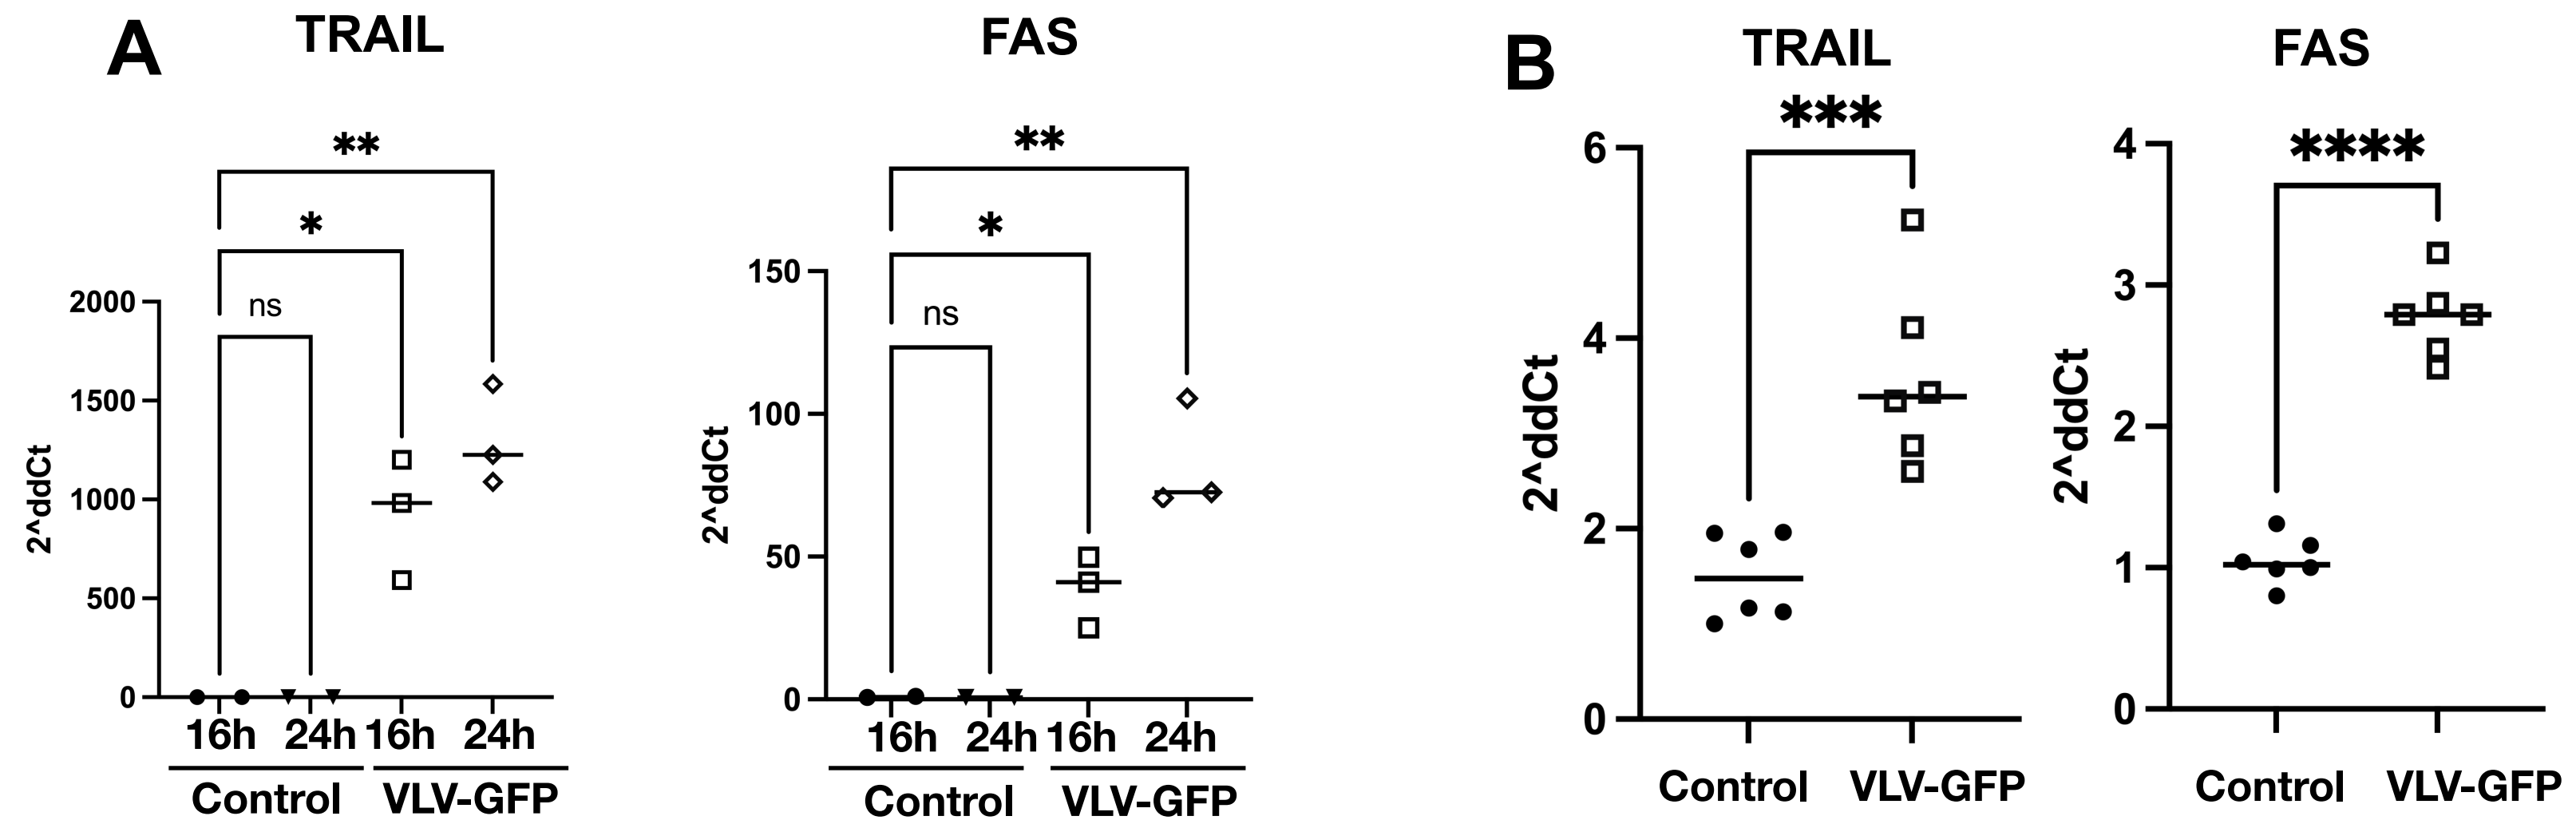



Supplementary Figure 6 **A**

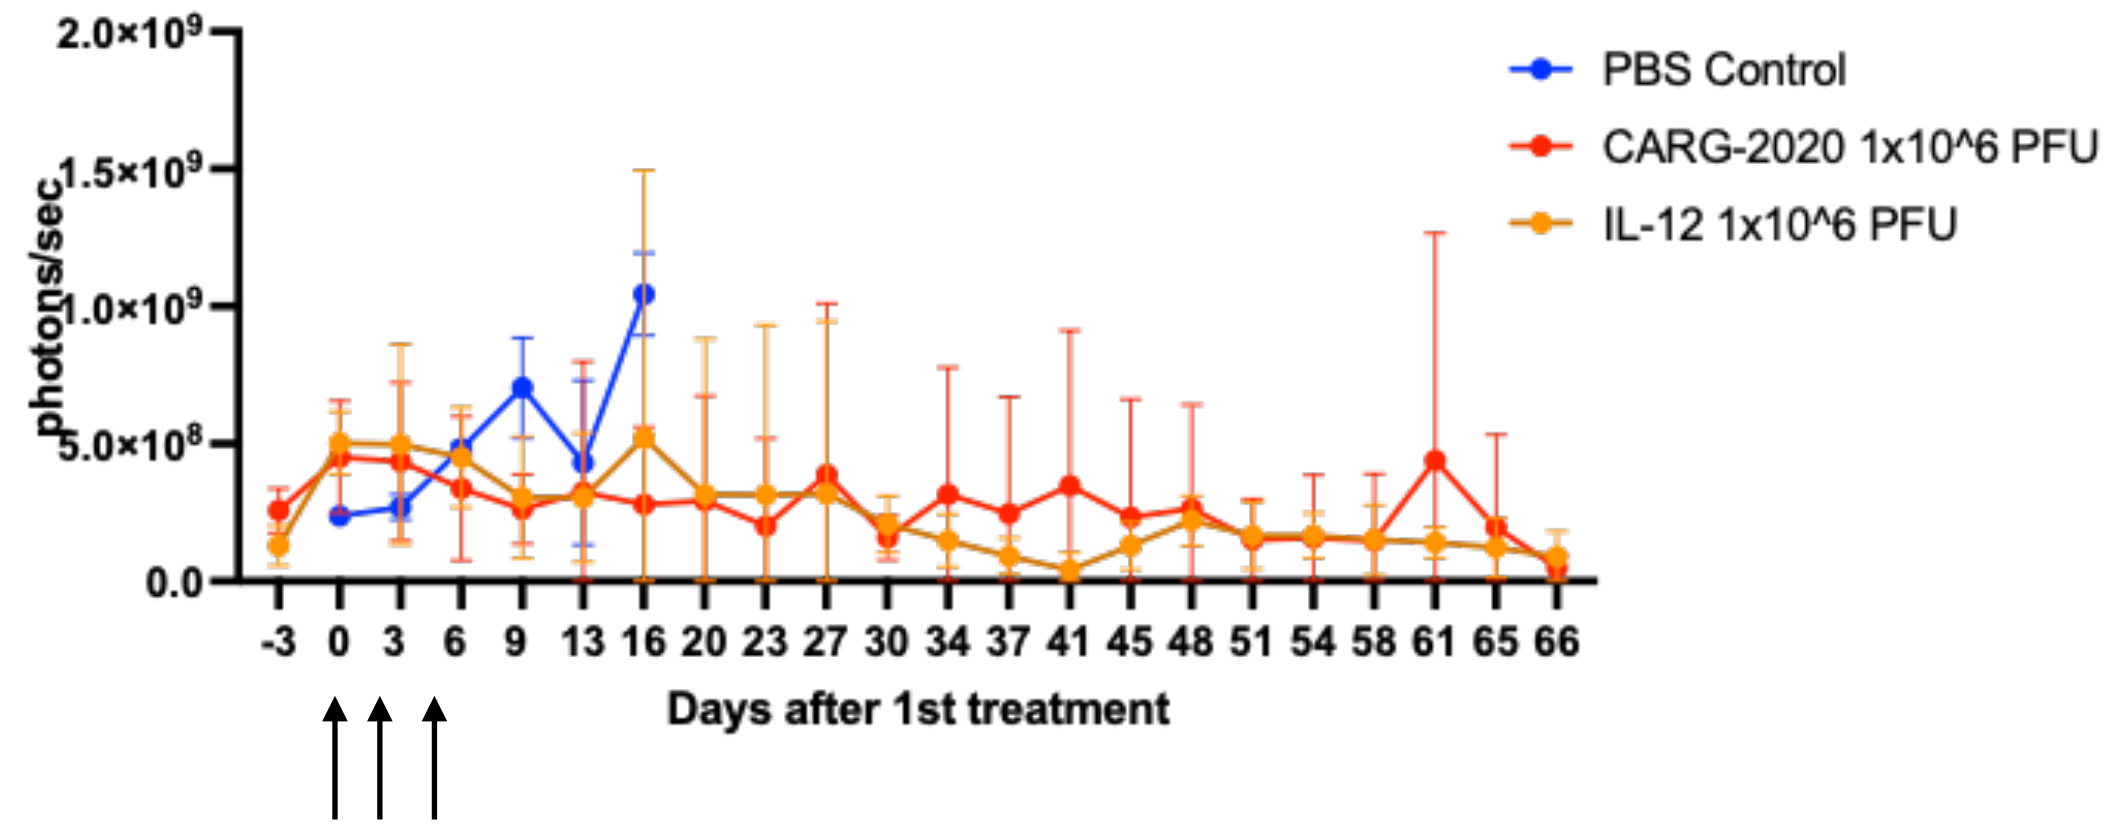

**B**

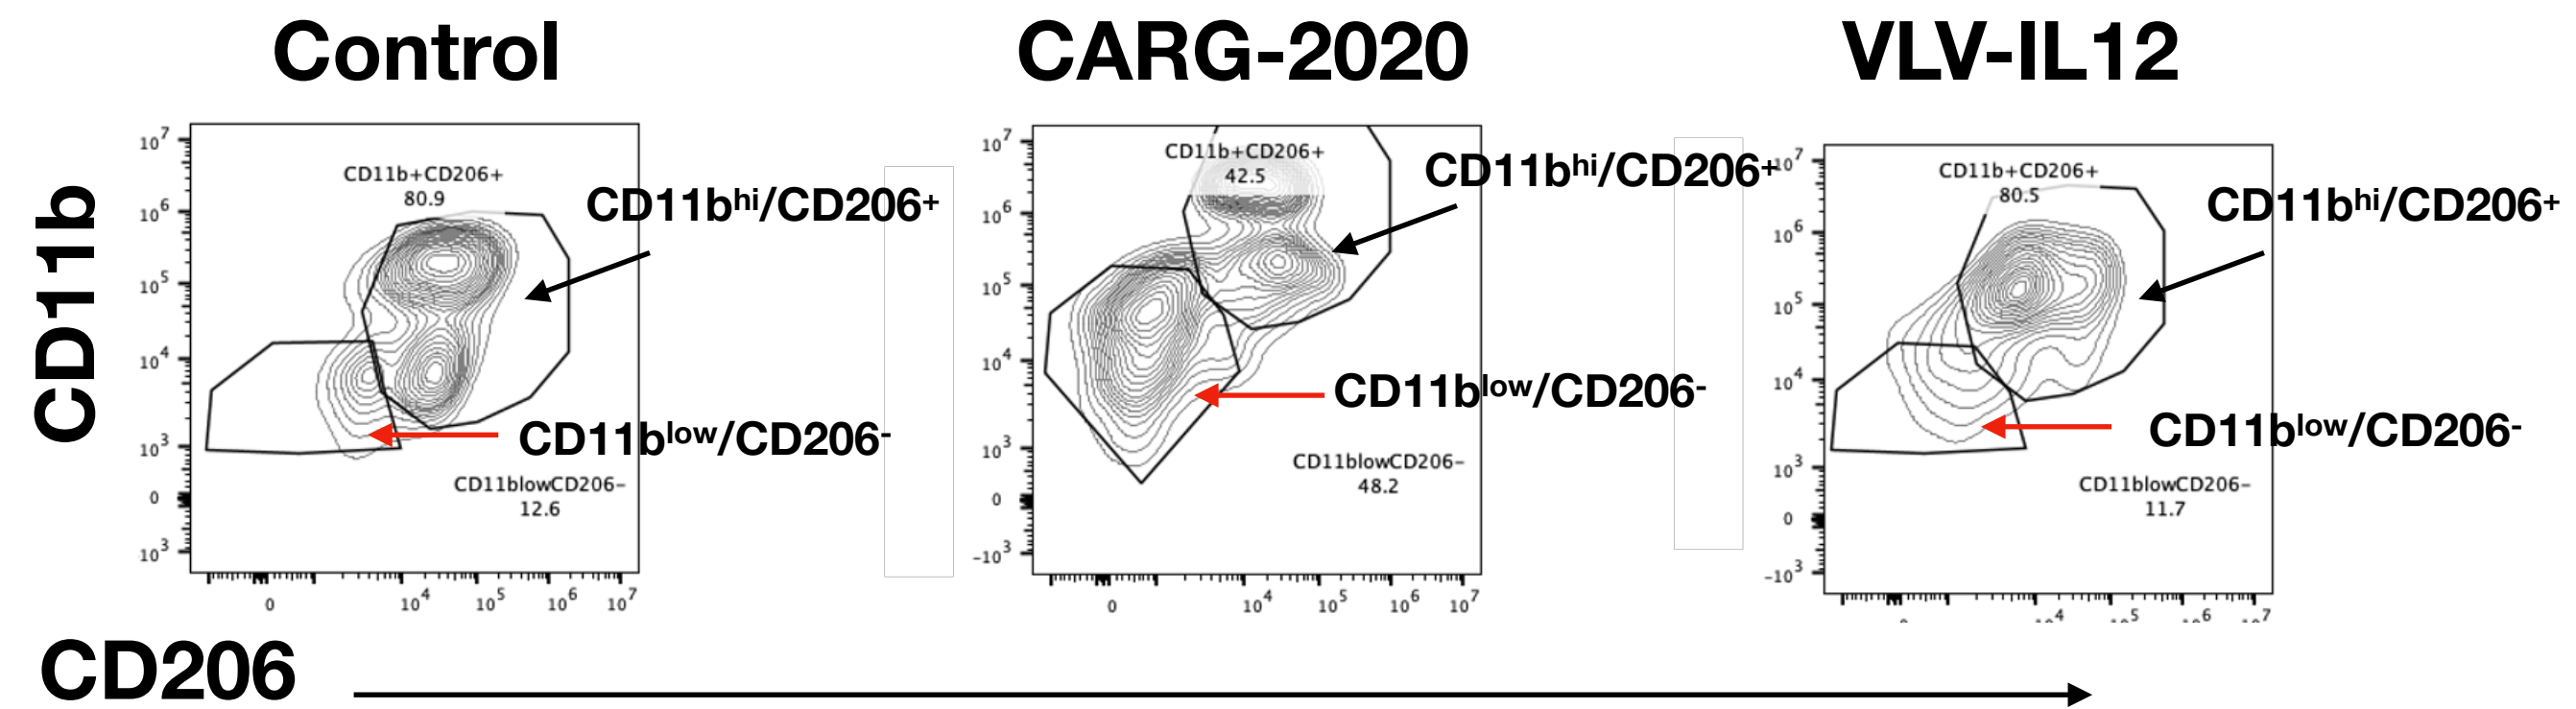

**C**

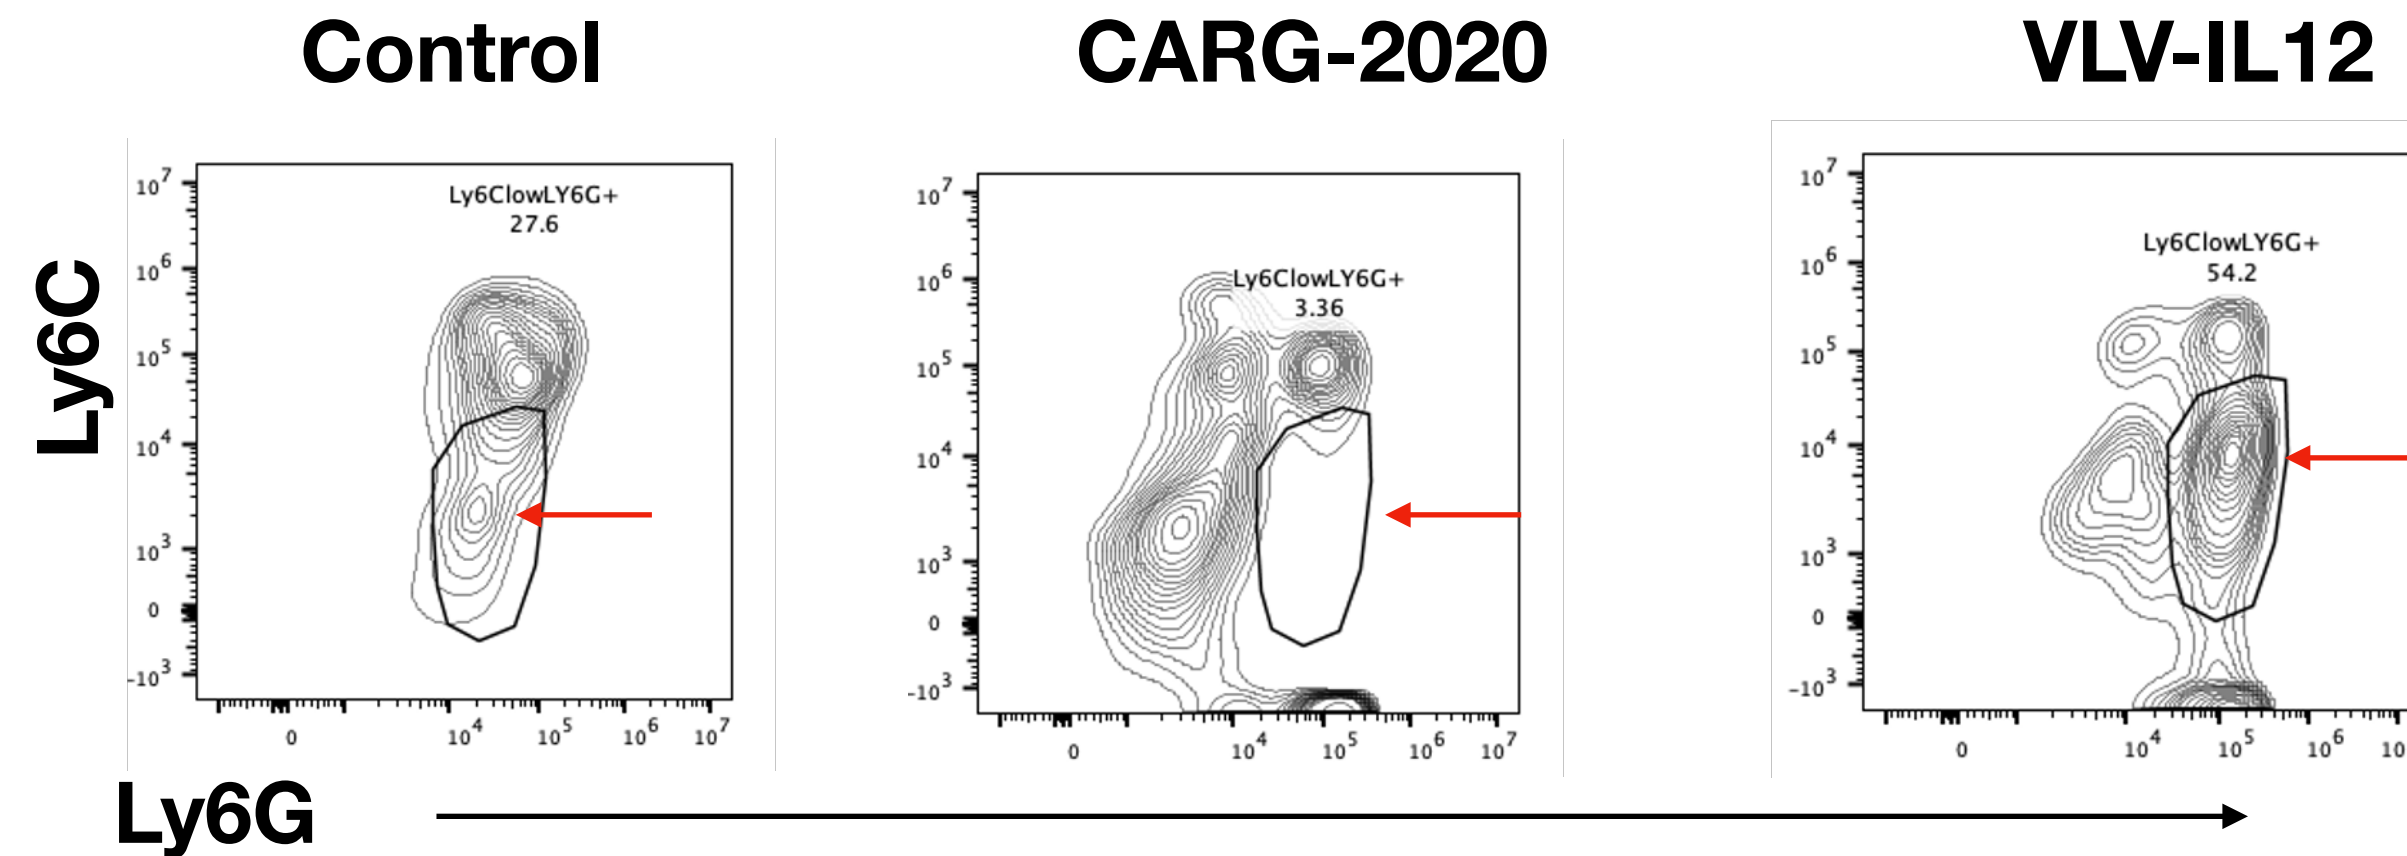



**A**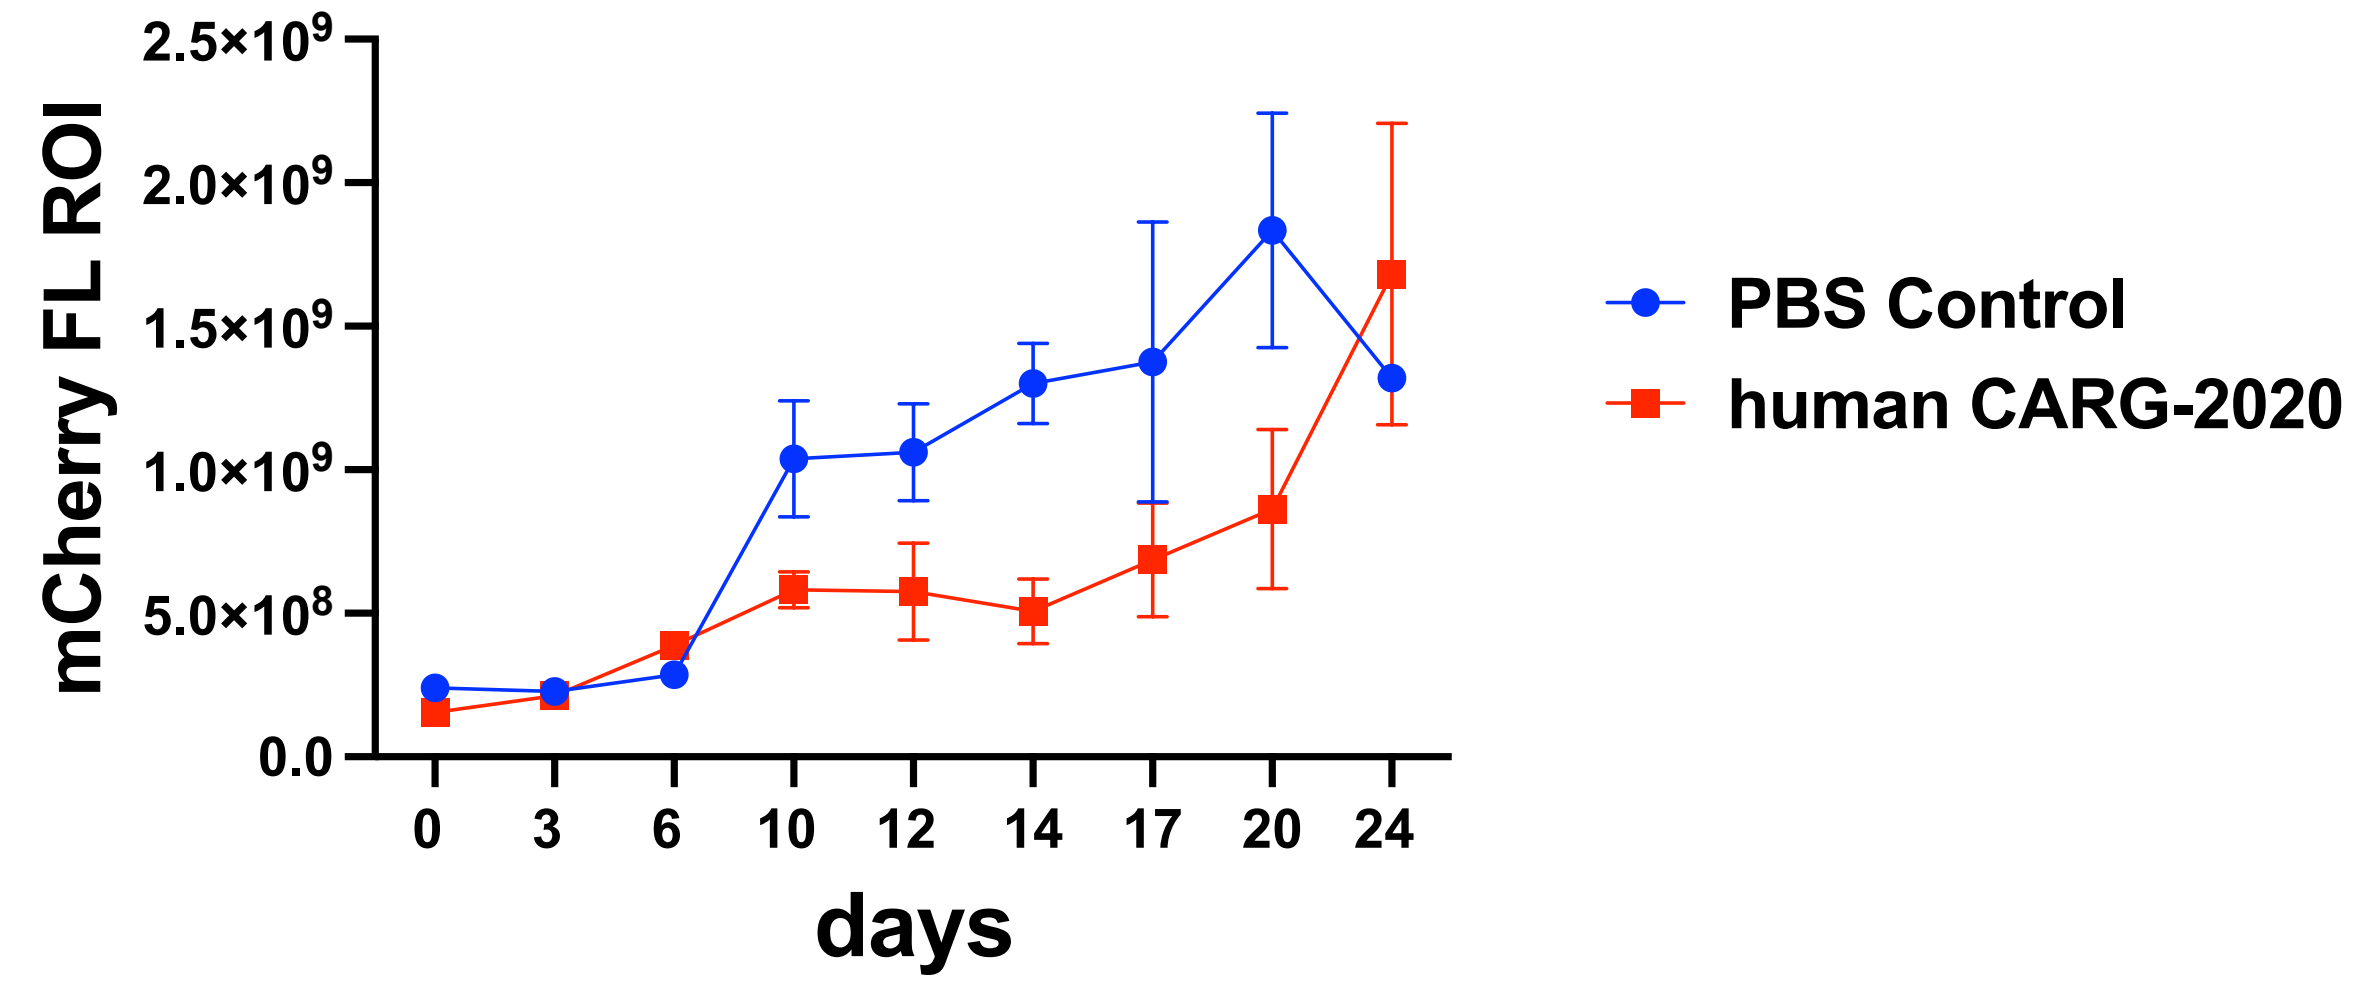**B**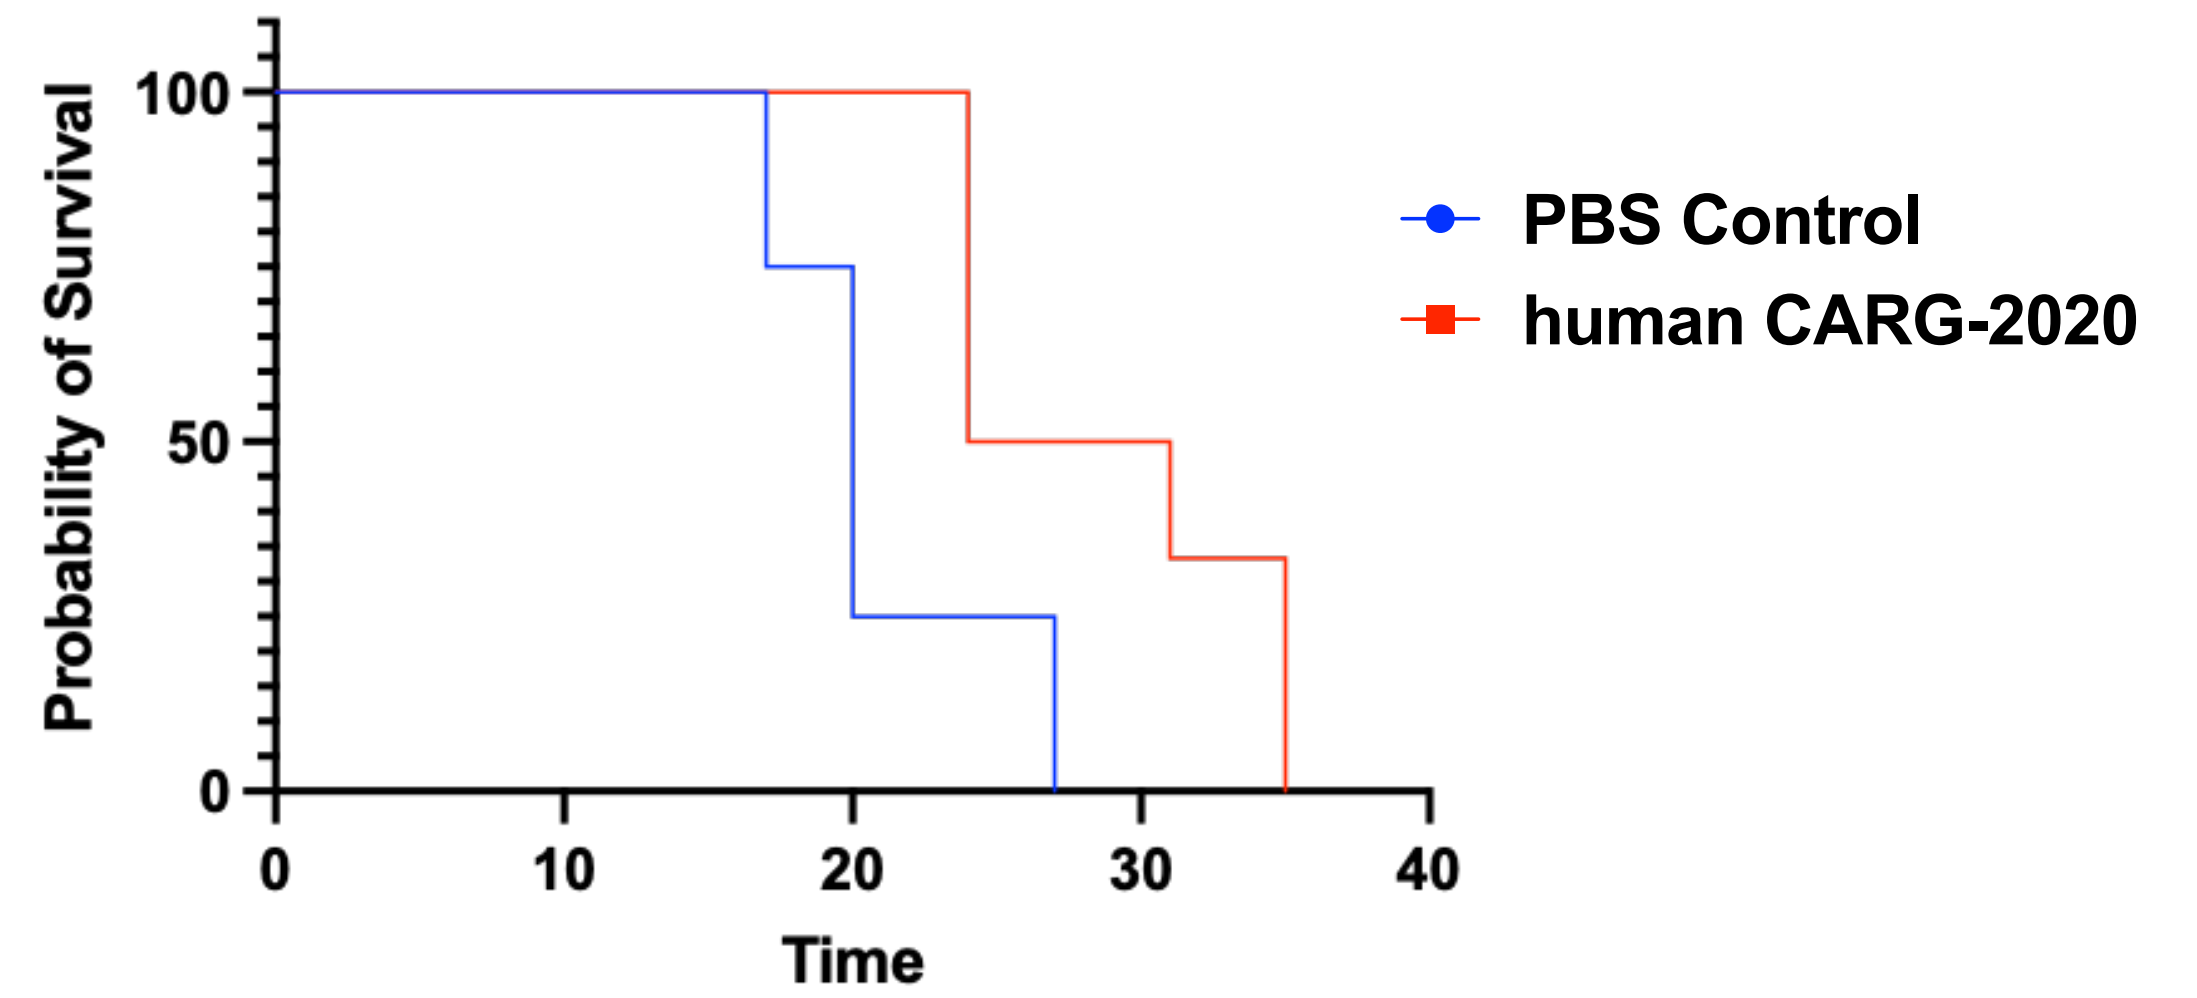

Supplement: media-1.pdf [file media-1.pdf]
