# Supplementary material for: Immune modulation of innate and adaptive responses restores immune surveillance and establishes anti-tumor immunological memory
Source: PubMed Central journal article supplement — bioRxiv. 2023 Sep 29:2023.09.27.559828. Preprint. [Version 1] doi: 10.1101/2023.09.27.559828 (PMC10557730; doi:10.1101/2023.09.27.559828), 2023-09-29
Supplement: media-2.pdf [file media-2.pdf]

## **Supplementary Figure 1**

Flow cytometry gating strategy CD8 T cells, Macrophages and MDSC.

## **Supplementary Figure 2**

Diagram showing major immune phenotypes in each phase of ovarian tumor progression.

### Supplementary Figure 3

- A.** Diagram of CARG-2020 vector and GFP control vector; **B.** TKO mouse ovarian cancer cells were treated *in vitro* with PBS Control or  $1 \times 10^5$  PFU/cell of CARG-2020 for 24h. IL12 mRNA was quantified by qPCR and secreted IL-12p40 and p70 protein were quantified using xMAP technology;
- C.** Expression of IL-12 and IL-17R ECD were detected by western blot analysis in total cell lysate.
- D.** Secretion of IL-17 RA-ECD was detected by western blot analysis in the supernatant of cells treated with CARG-2020. Control cells were treated with VLV-GFP vector. Representative image of 3 independent experiments.
- E.** Expression of PDL-1 following treatment with CARG-2020. Note the time dependent decrease on PDL-1 expression on cells treated with CARG-2020. Control=VLV-GFP. Representative image of 3 independent experiments.

#### Supplementary Figure 4

**A.** TKO mouse ovarian cancer cells were treated with increasing concentrations of CARG-2020 or VLV-GFP and effect on cell growth and cell death is quantified in real time using Cytation5/Biospa by measuring mCherry confluence and Celltox<sup>TM</sup> fluorescence; **B.** Representative fluorescence images showing PBS Control and CARG-2020-treated cultures. *red*, mCherry; *green*, Celltox<sup>TM</sup>; **C.** Human ovarian cancer cells, clone OCSC1-F2 and the hTERT-immortalized human endometrial stromal cells were treated with increasing concentrations of CARG-2020 for 72h and cell death was quantified using Celltox<sup>TM</sup> fluorescence. Note that CARG-2020 induces cell death only in cancer cells and not in normal cells.

### **Supplementary Figure 5**

**A.** Cytolytic effect of VLV-GFP in cancer cells is mediated by the induction of pro-apoptotic genes. Treatment of cancer cells with VLV-GFP is associated with a significant increase on TRAIL and FAS mRNA expression. \*= $p>0.005$ ; \*\*= $p>0.001$

**B.** In vivo induction of pro-apoptotic genes. Mice bearing mCherry-TKO tumors were treated 2X with VLV-GFP. The expression of TRAIL and FAS was determined 24h after the last treatment. Note the significant increase on TRAIL and FAS mRNA expression following VLV-GFP treatment. \*\*\*= $p>0.0001$

### **Supplementary Figure 6**

**A.** Antitumoral effect of VLV-IL12 and CARG-2020 in mouse ovarian cancer. Tumor growth was measured by mCherry ROI fluorescence (arrows show day of treatment).

**B.** CARG-2020 but not VLV-IL-12 modulates the innate immune system. Peritoneal lavage from VLV-IL-12 and CARG-2020-treated mice (n=6) were analyzed by flow cytometry for macrophages using CD11b and CD206. VLV-IL-12 treatment is not able to increase the number of CD11b<sup>low</sup>/CD206<sup>-</sup> macrophages compared to CARG2020. Representative dot plots shown. Gating strategy is shown in Supp. Fig. 1.

**C.** Decrease on Ly6C+/Ly6G+ MSC is observed only in the CARG2020 treated group but not in those treated with VLV-IL-12 group. Representative dot plots shown. Gating strategy is shown in Supp. Fig. 1.

## Supplementary Figure 7

**A.** Mean tumor burden over time of nude mice bearing OCSC1-F2 human ovarian tumors. mCherry fluorescent ROI was used to provide a measure of tumor burden. Data are presented as mean  $\pm$  SEM. Treatments began on day 6 and continued through to day 12.

**B.** Survival analysis using Kaplan-Meier.
